# Supplementary material
Source: publisher figshare collection journal article supplement (https://frontiersin.figshare.com/ndownloader/files/22043418)

Module1

PCC

LA

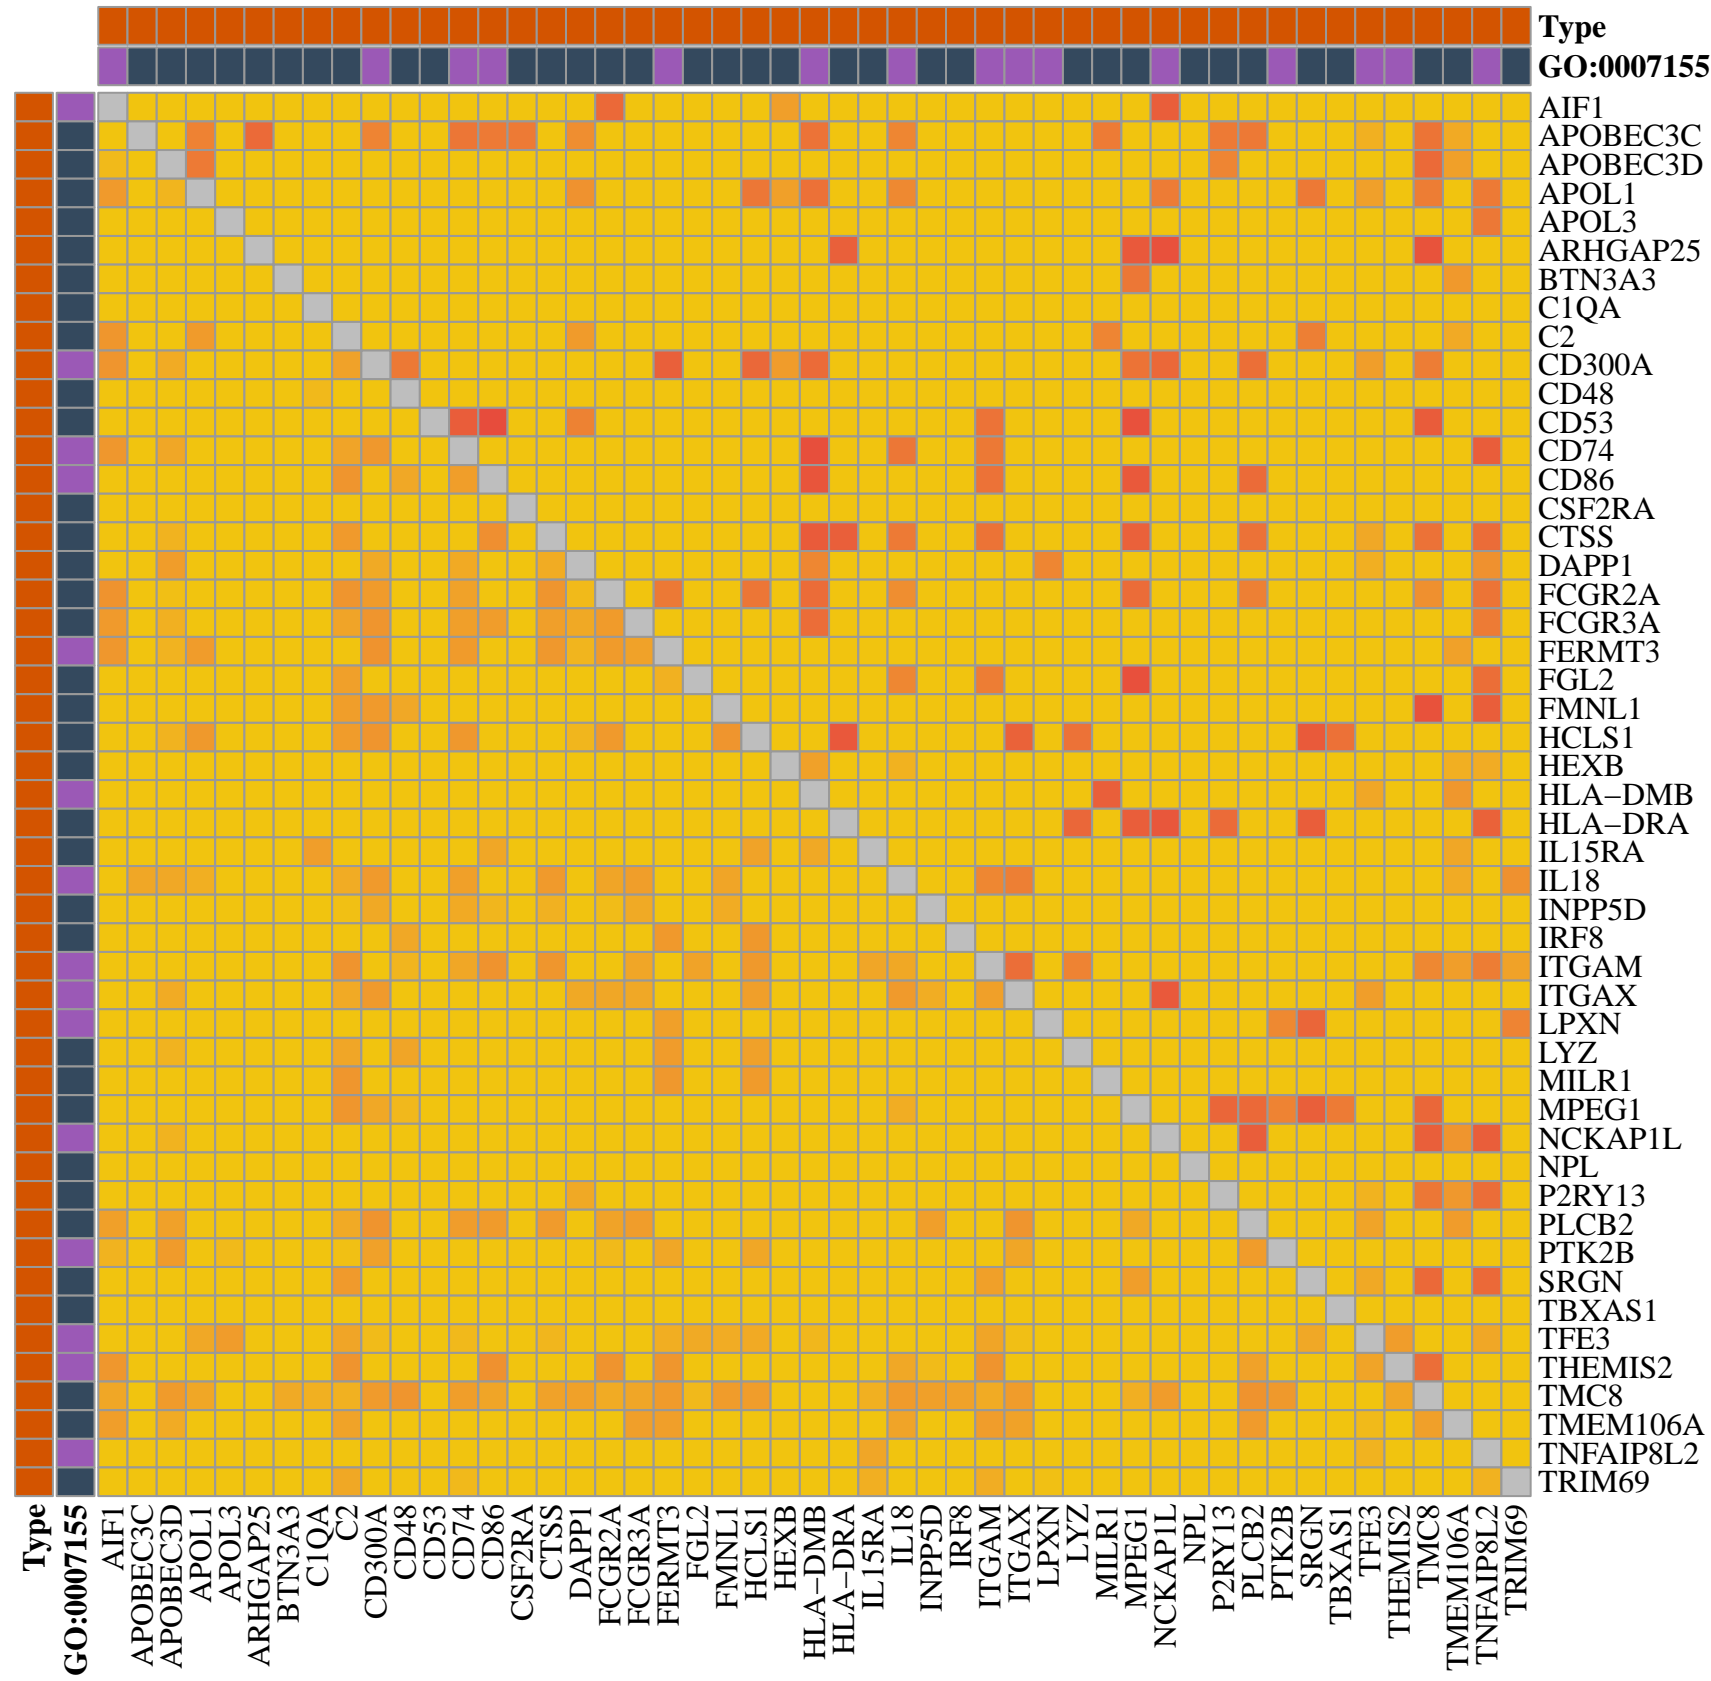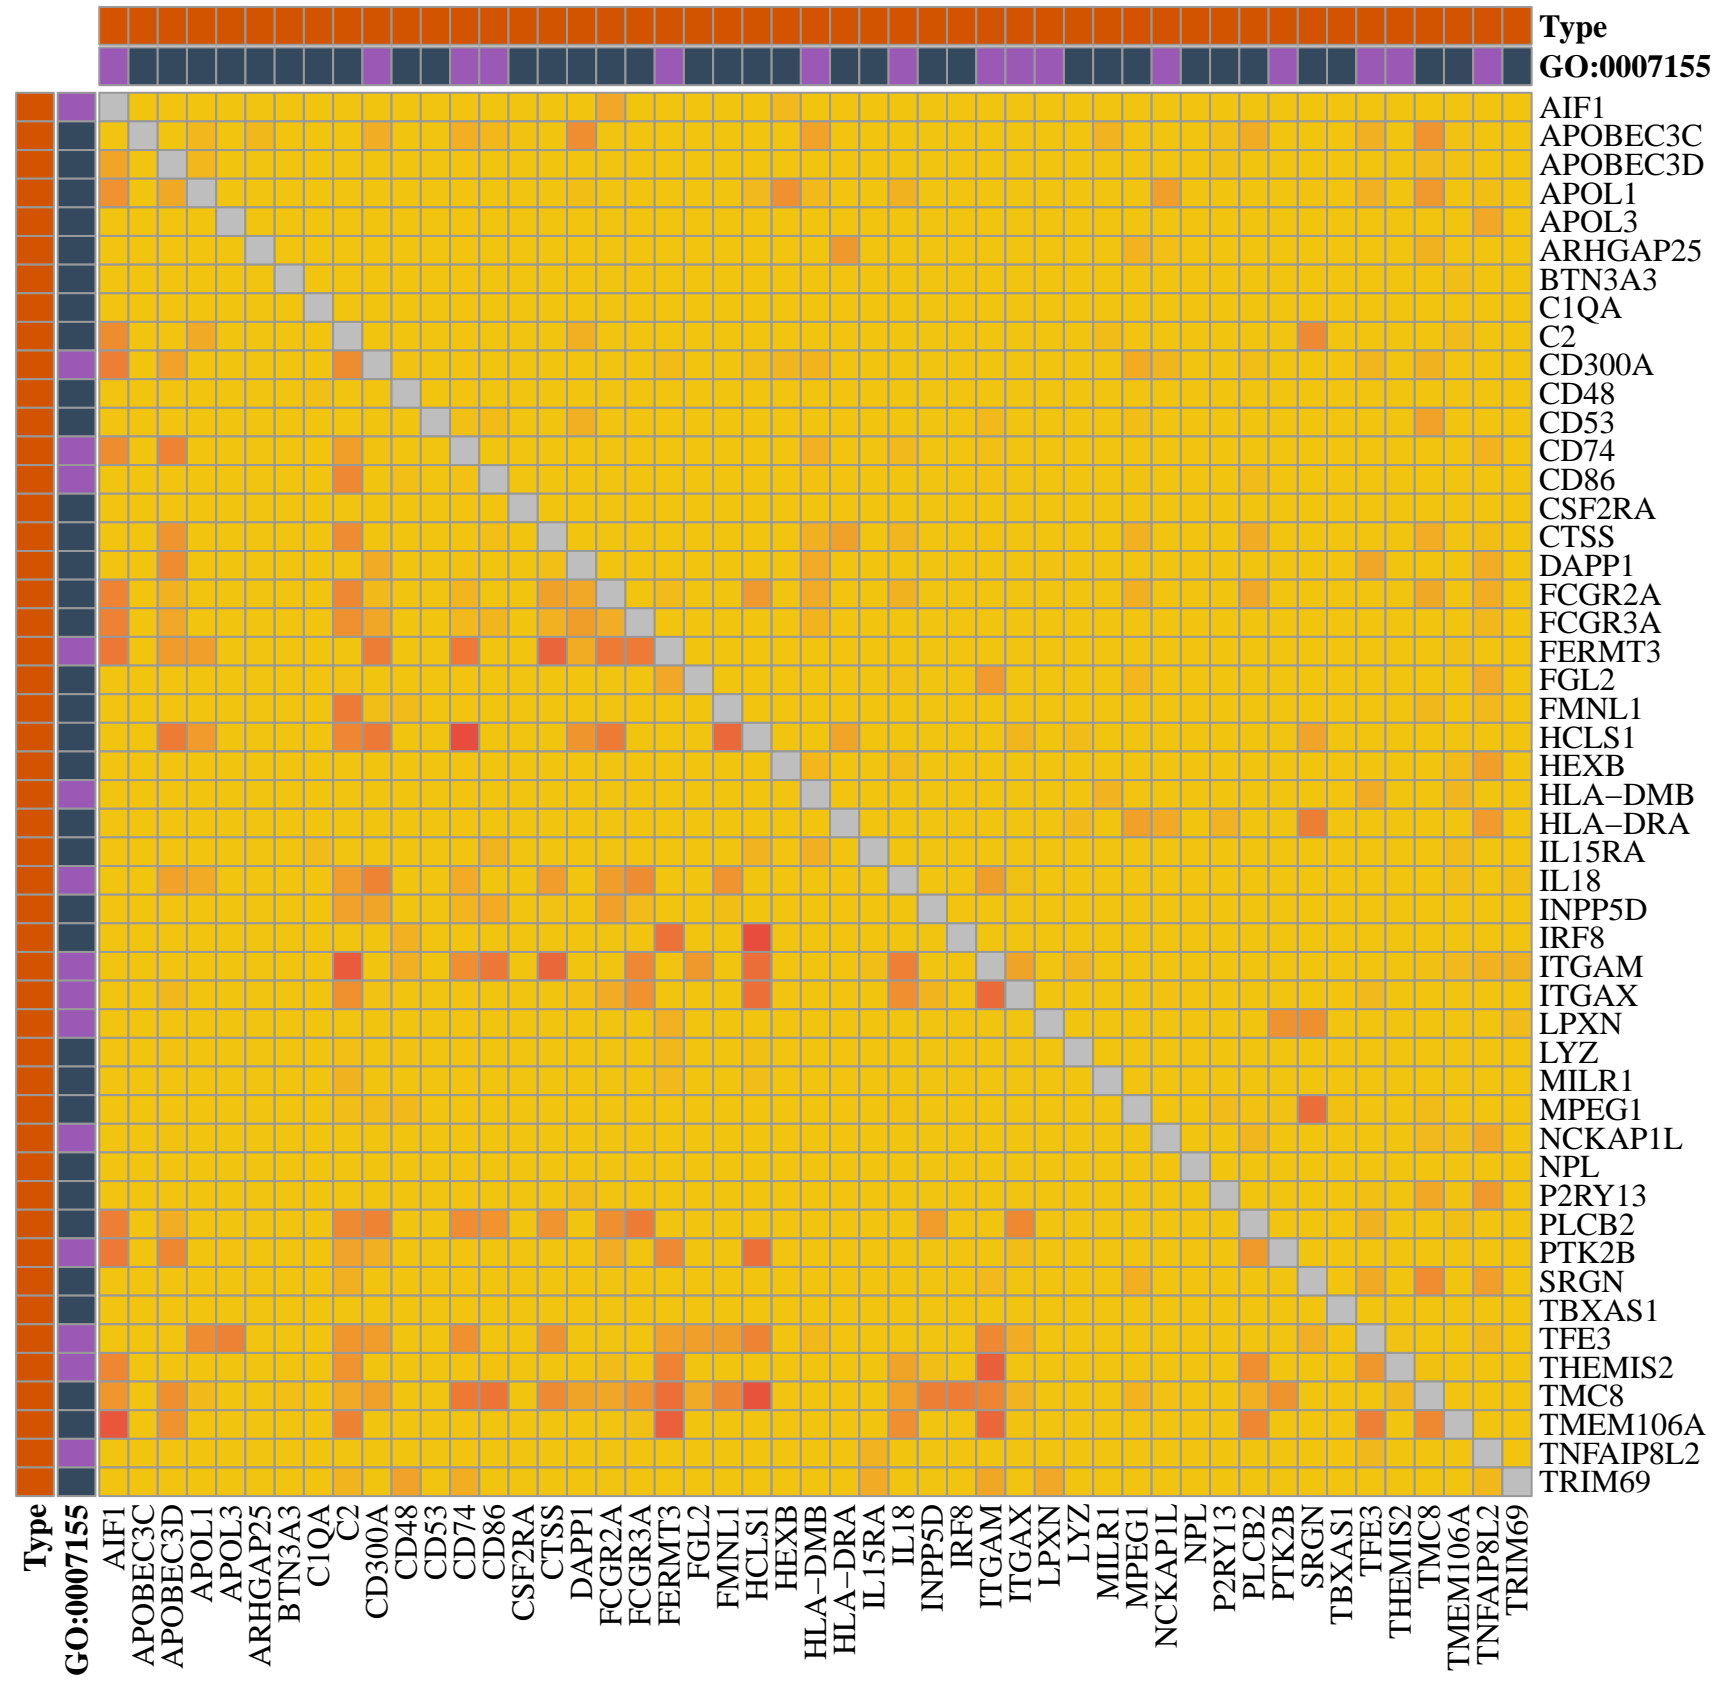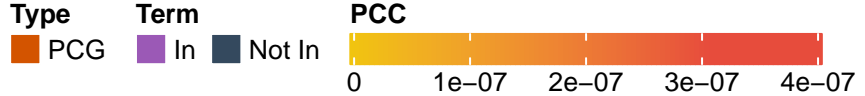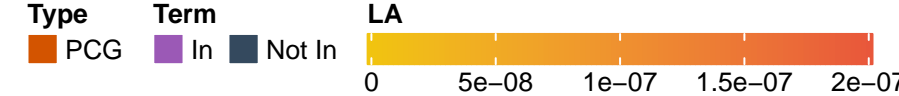



Module62

PCC

LA

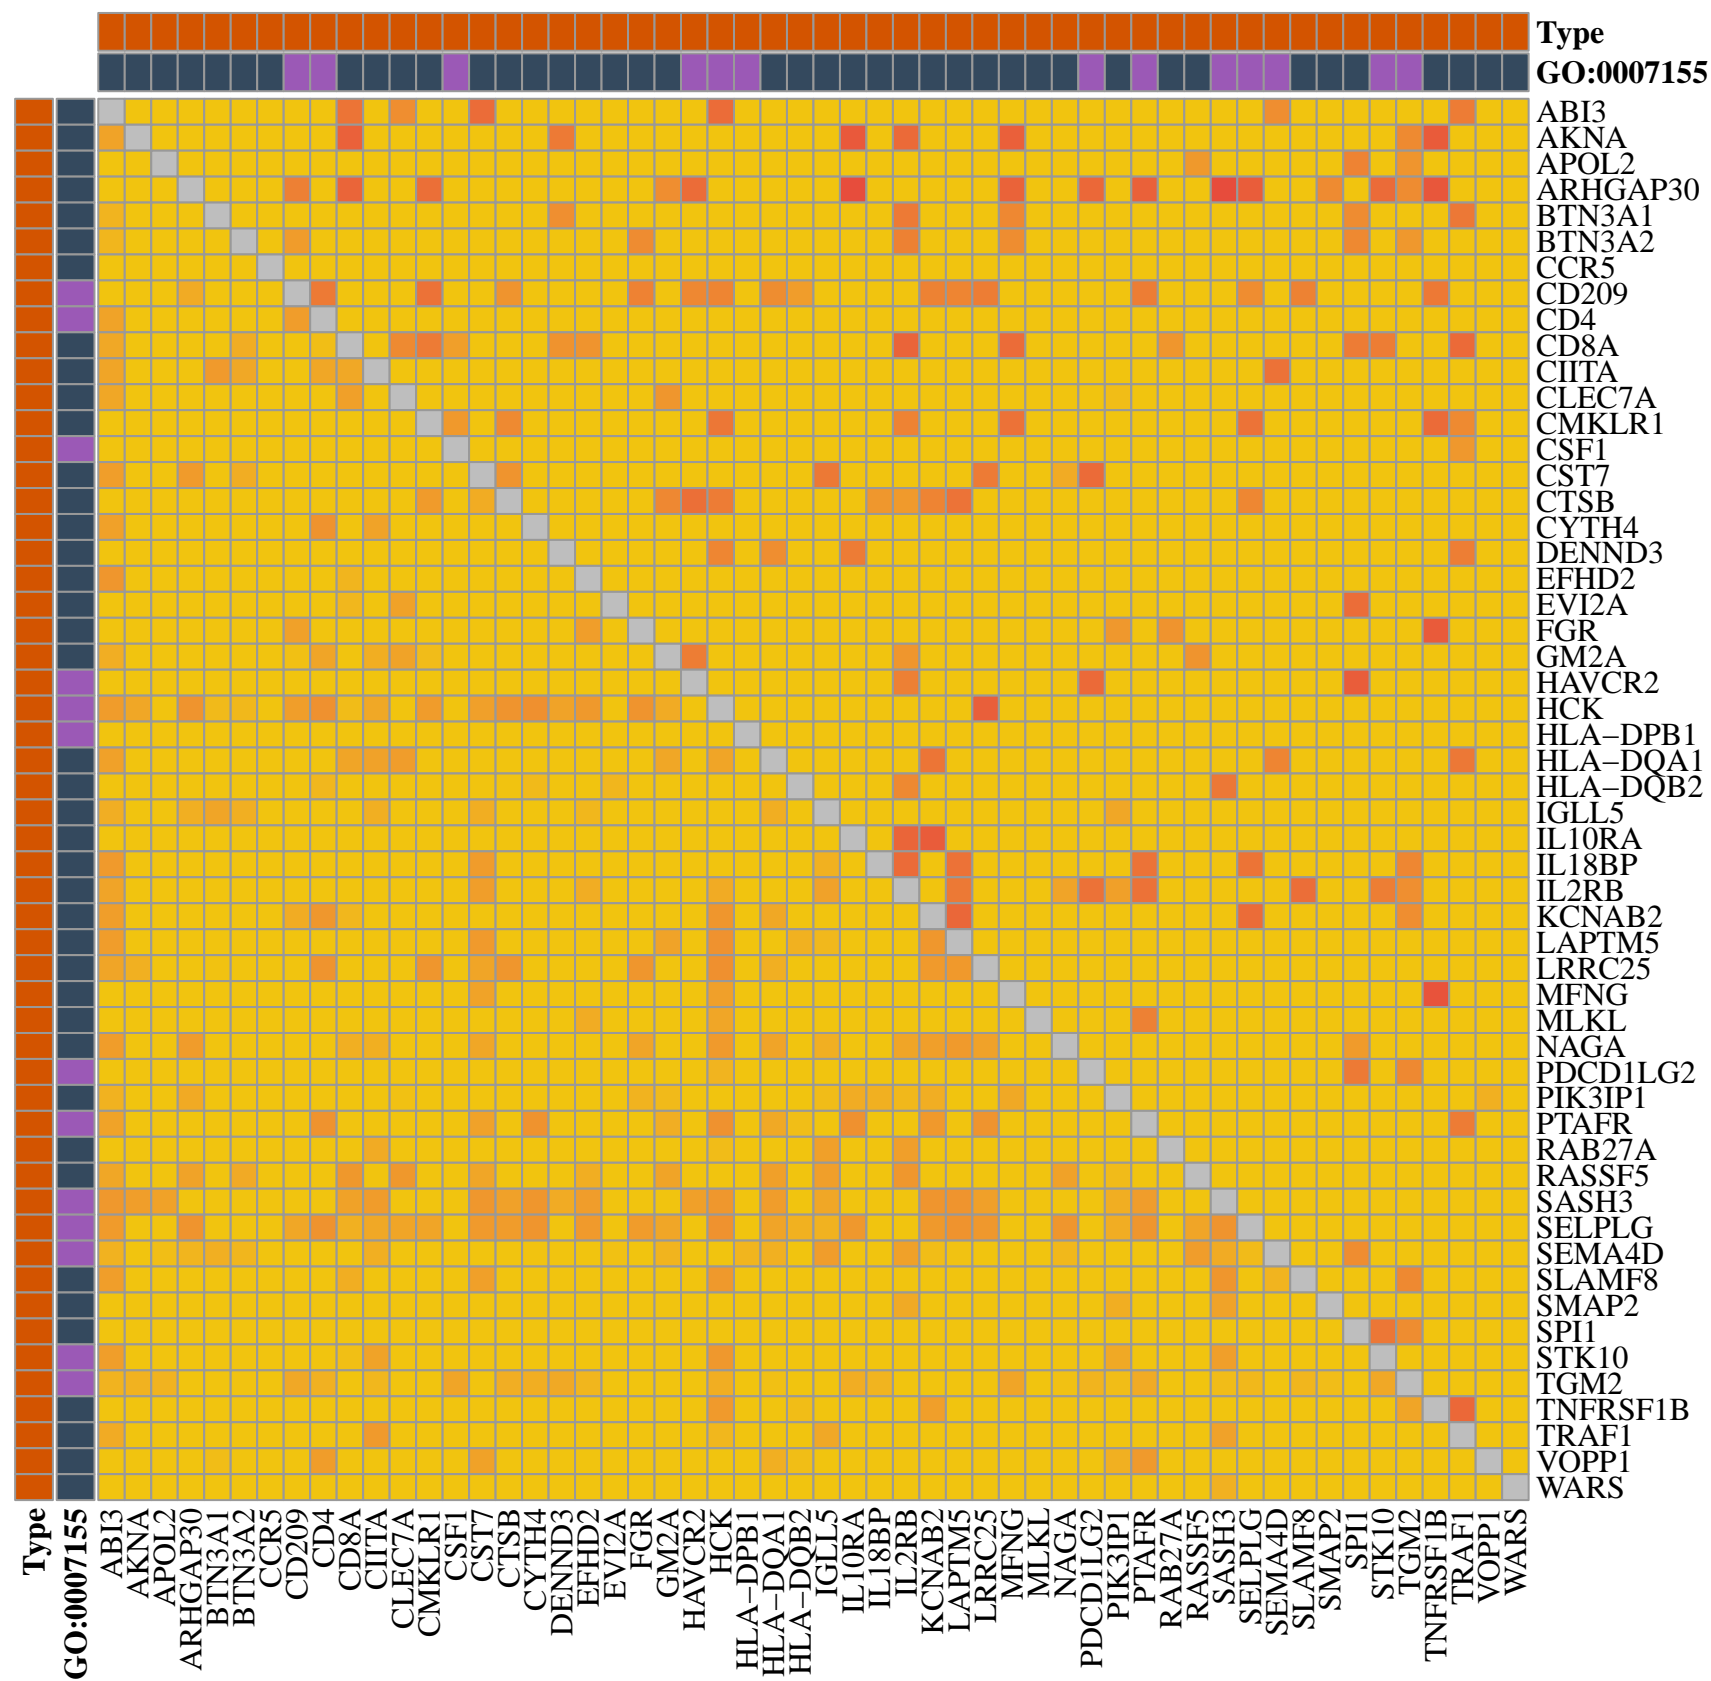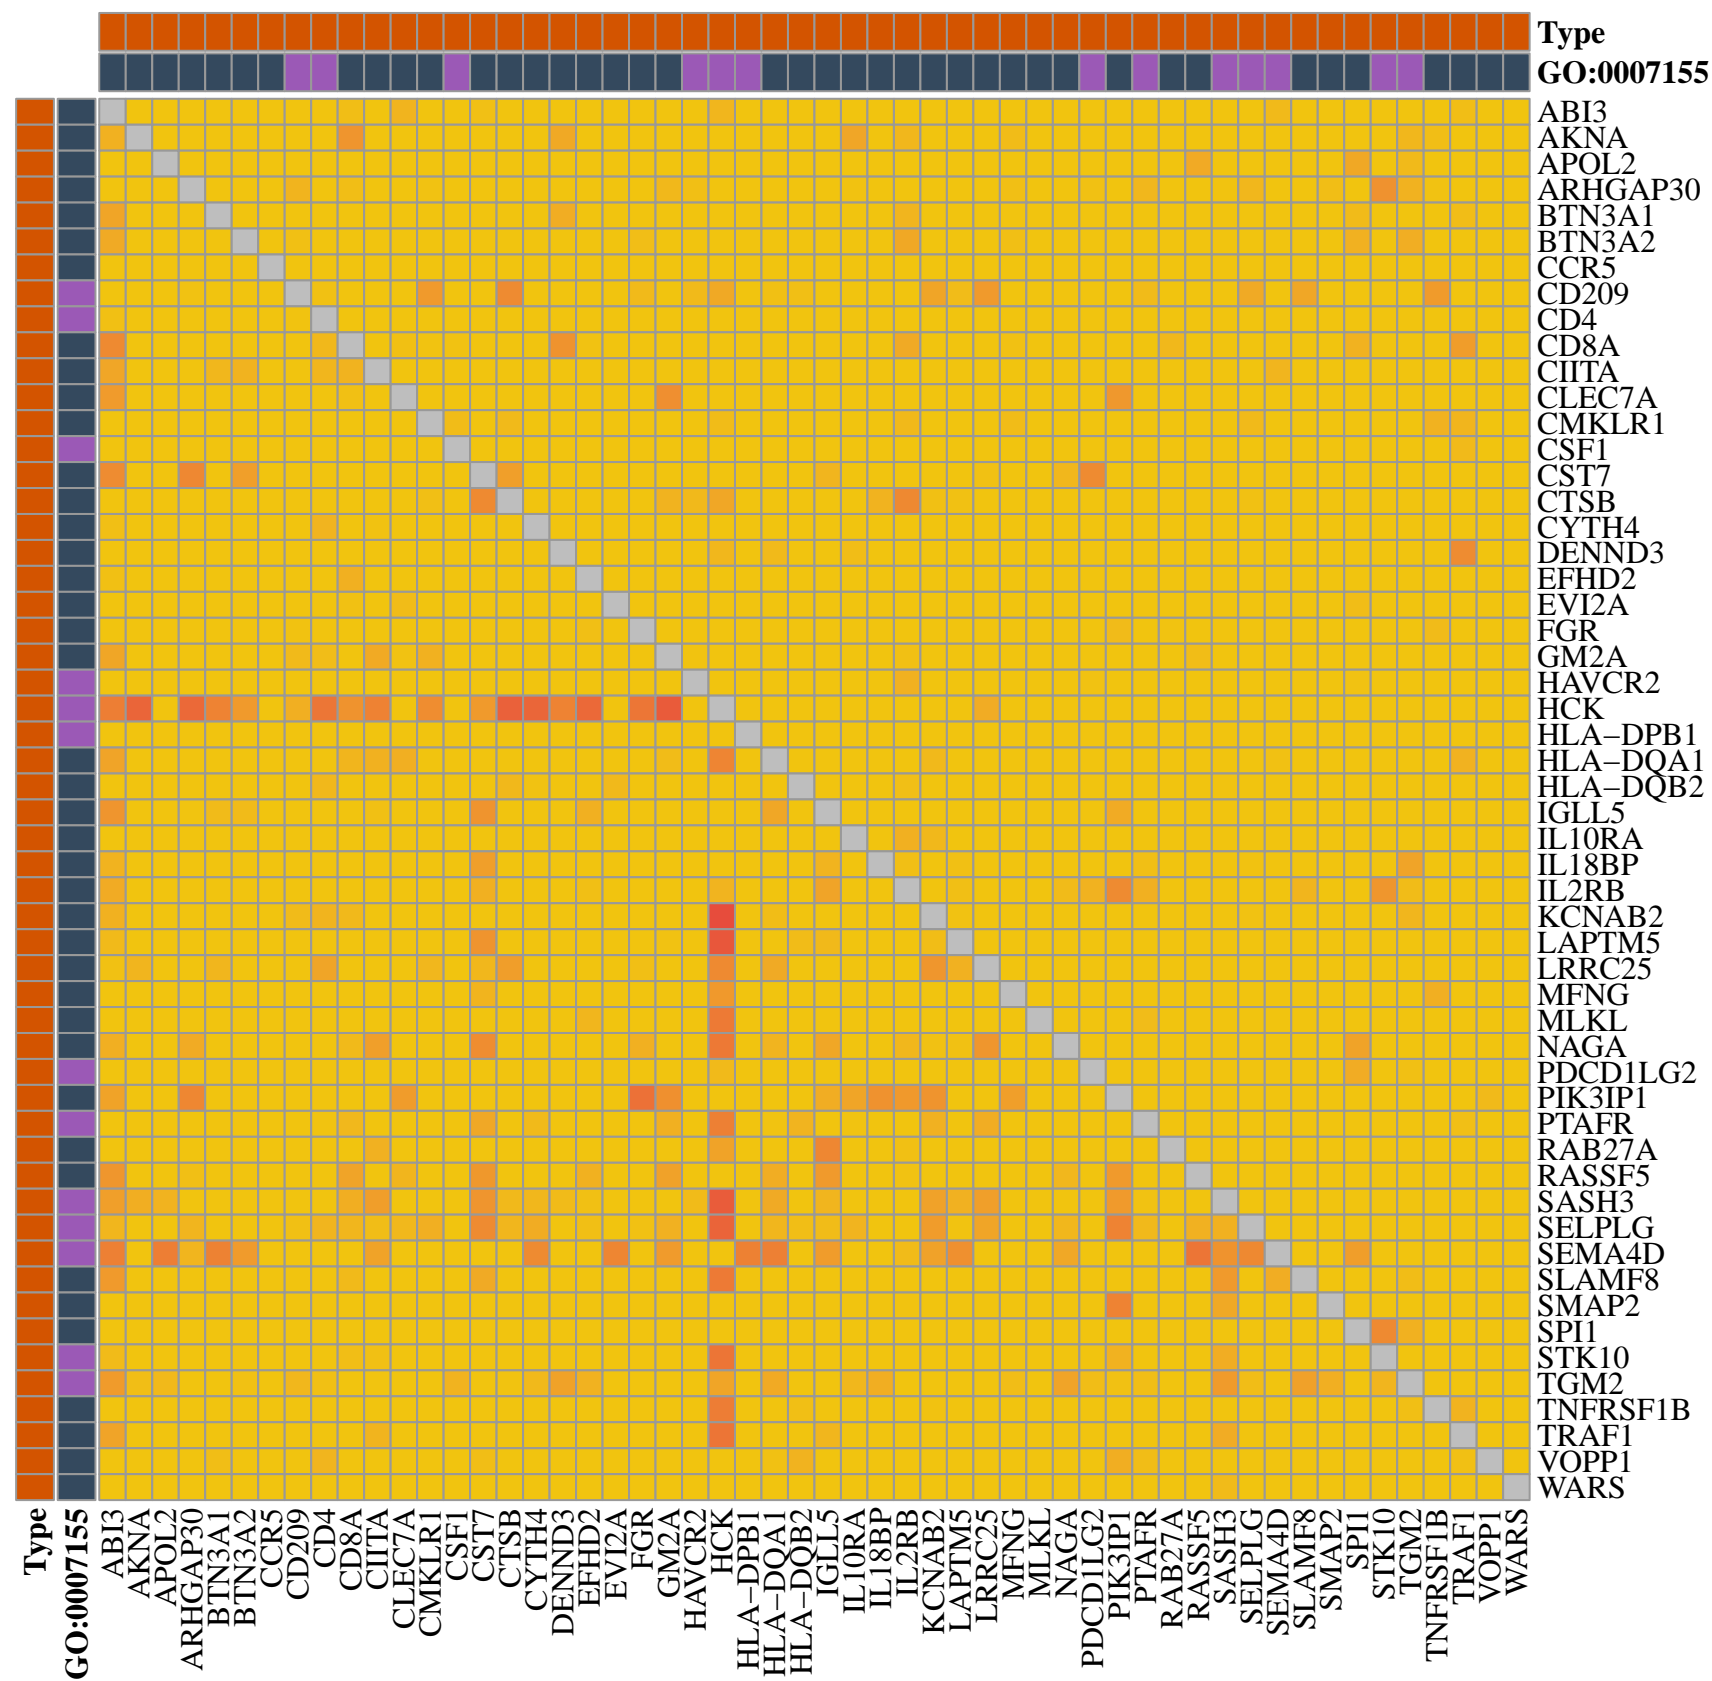

Module261

PCC

LA

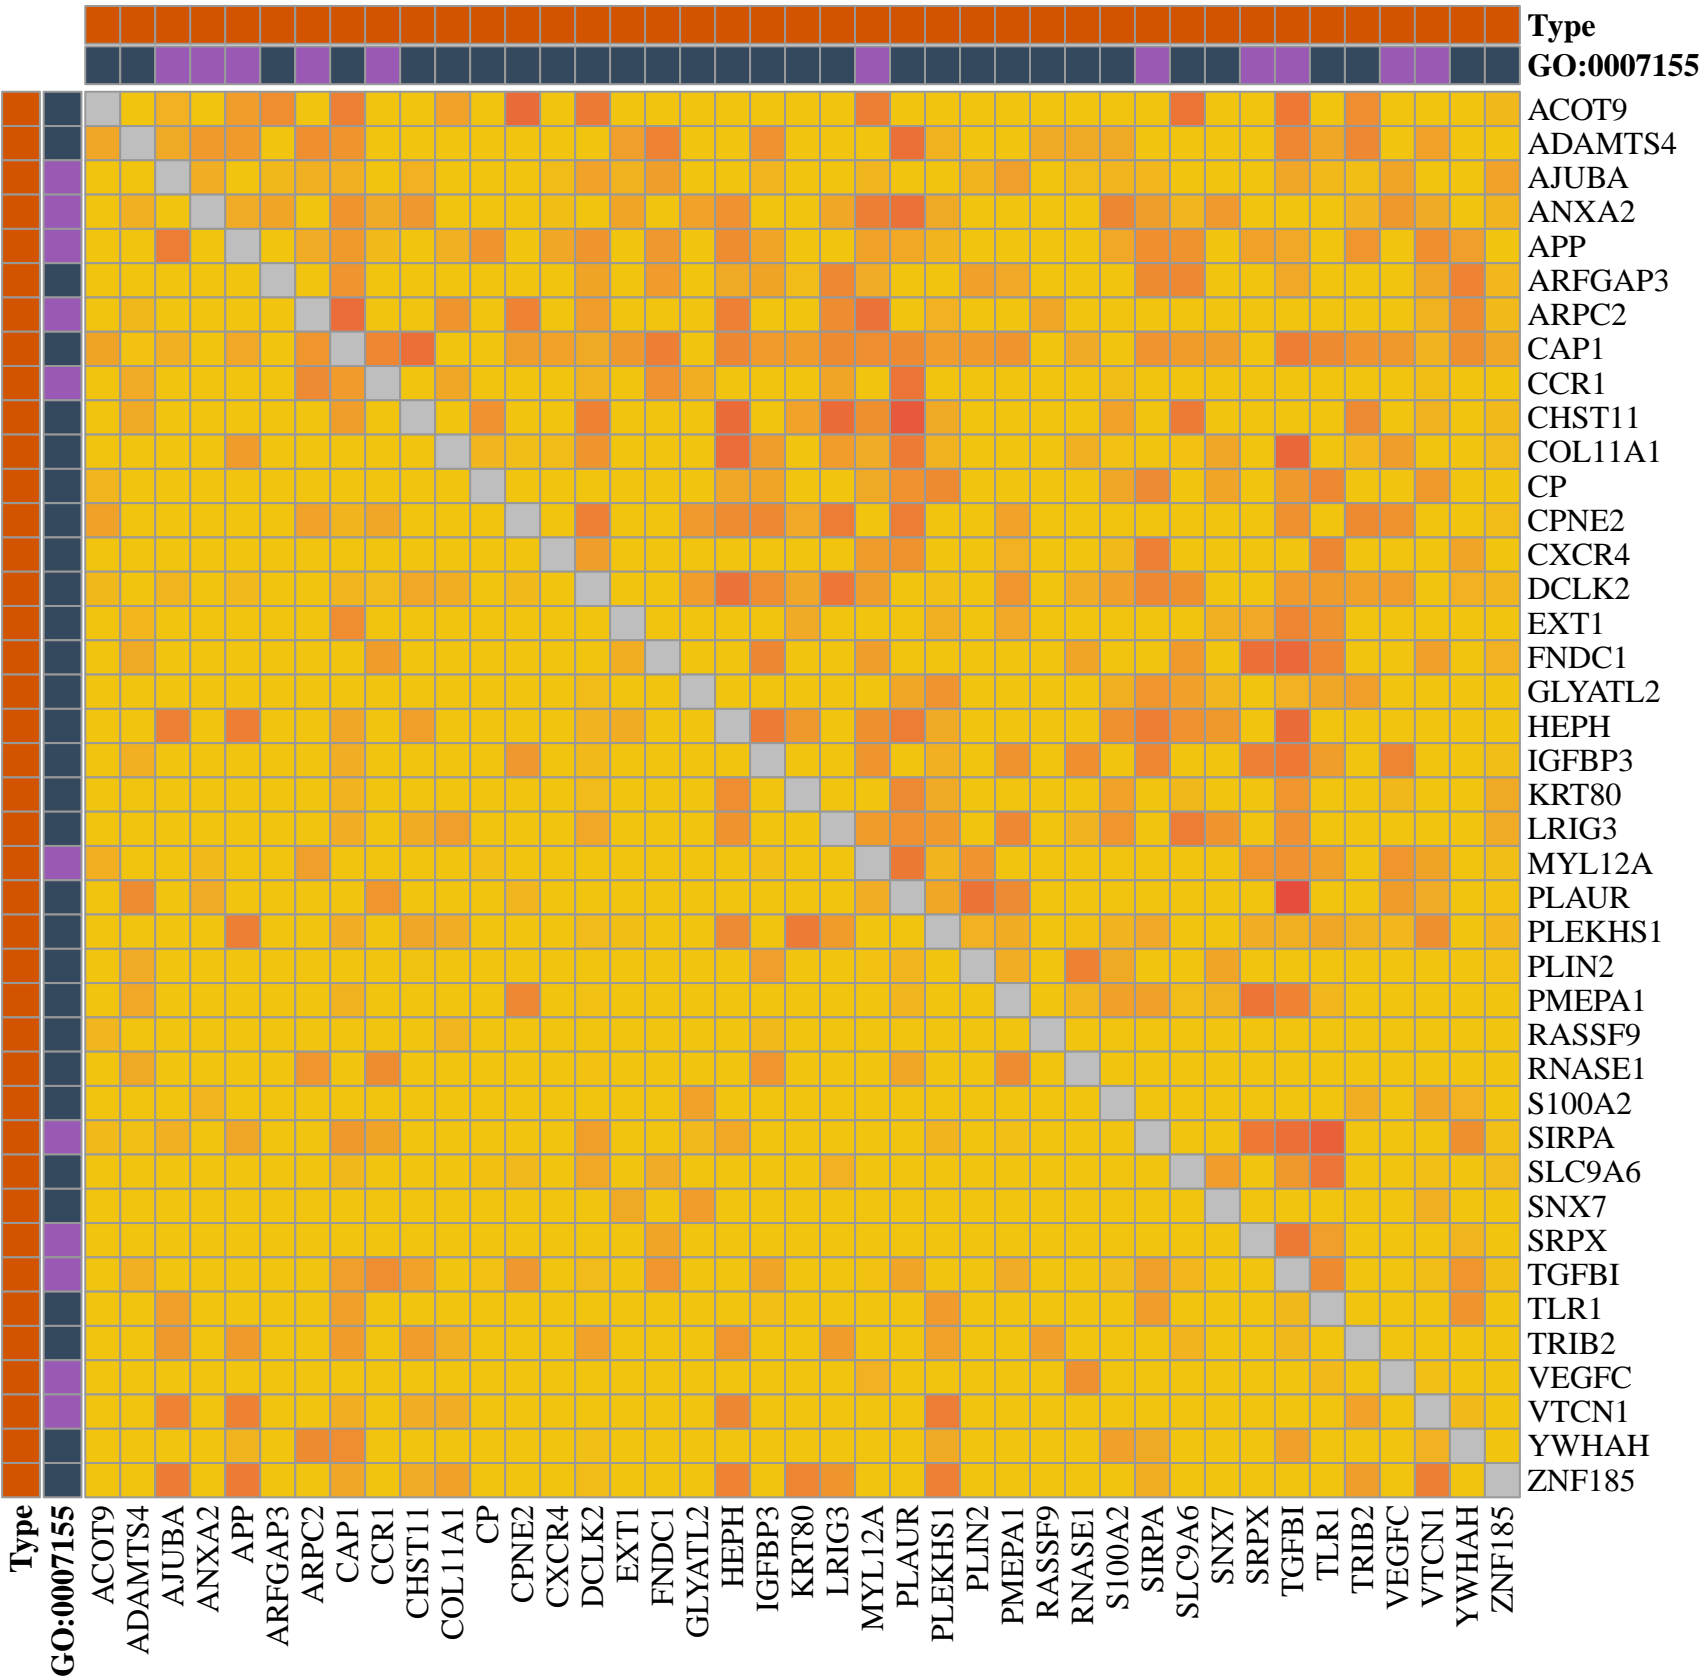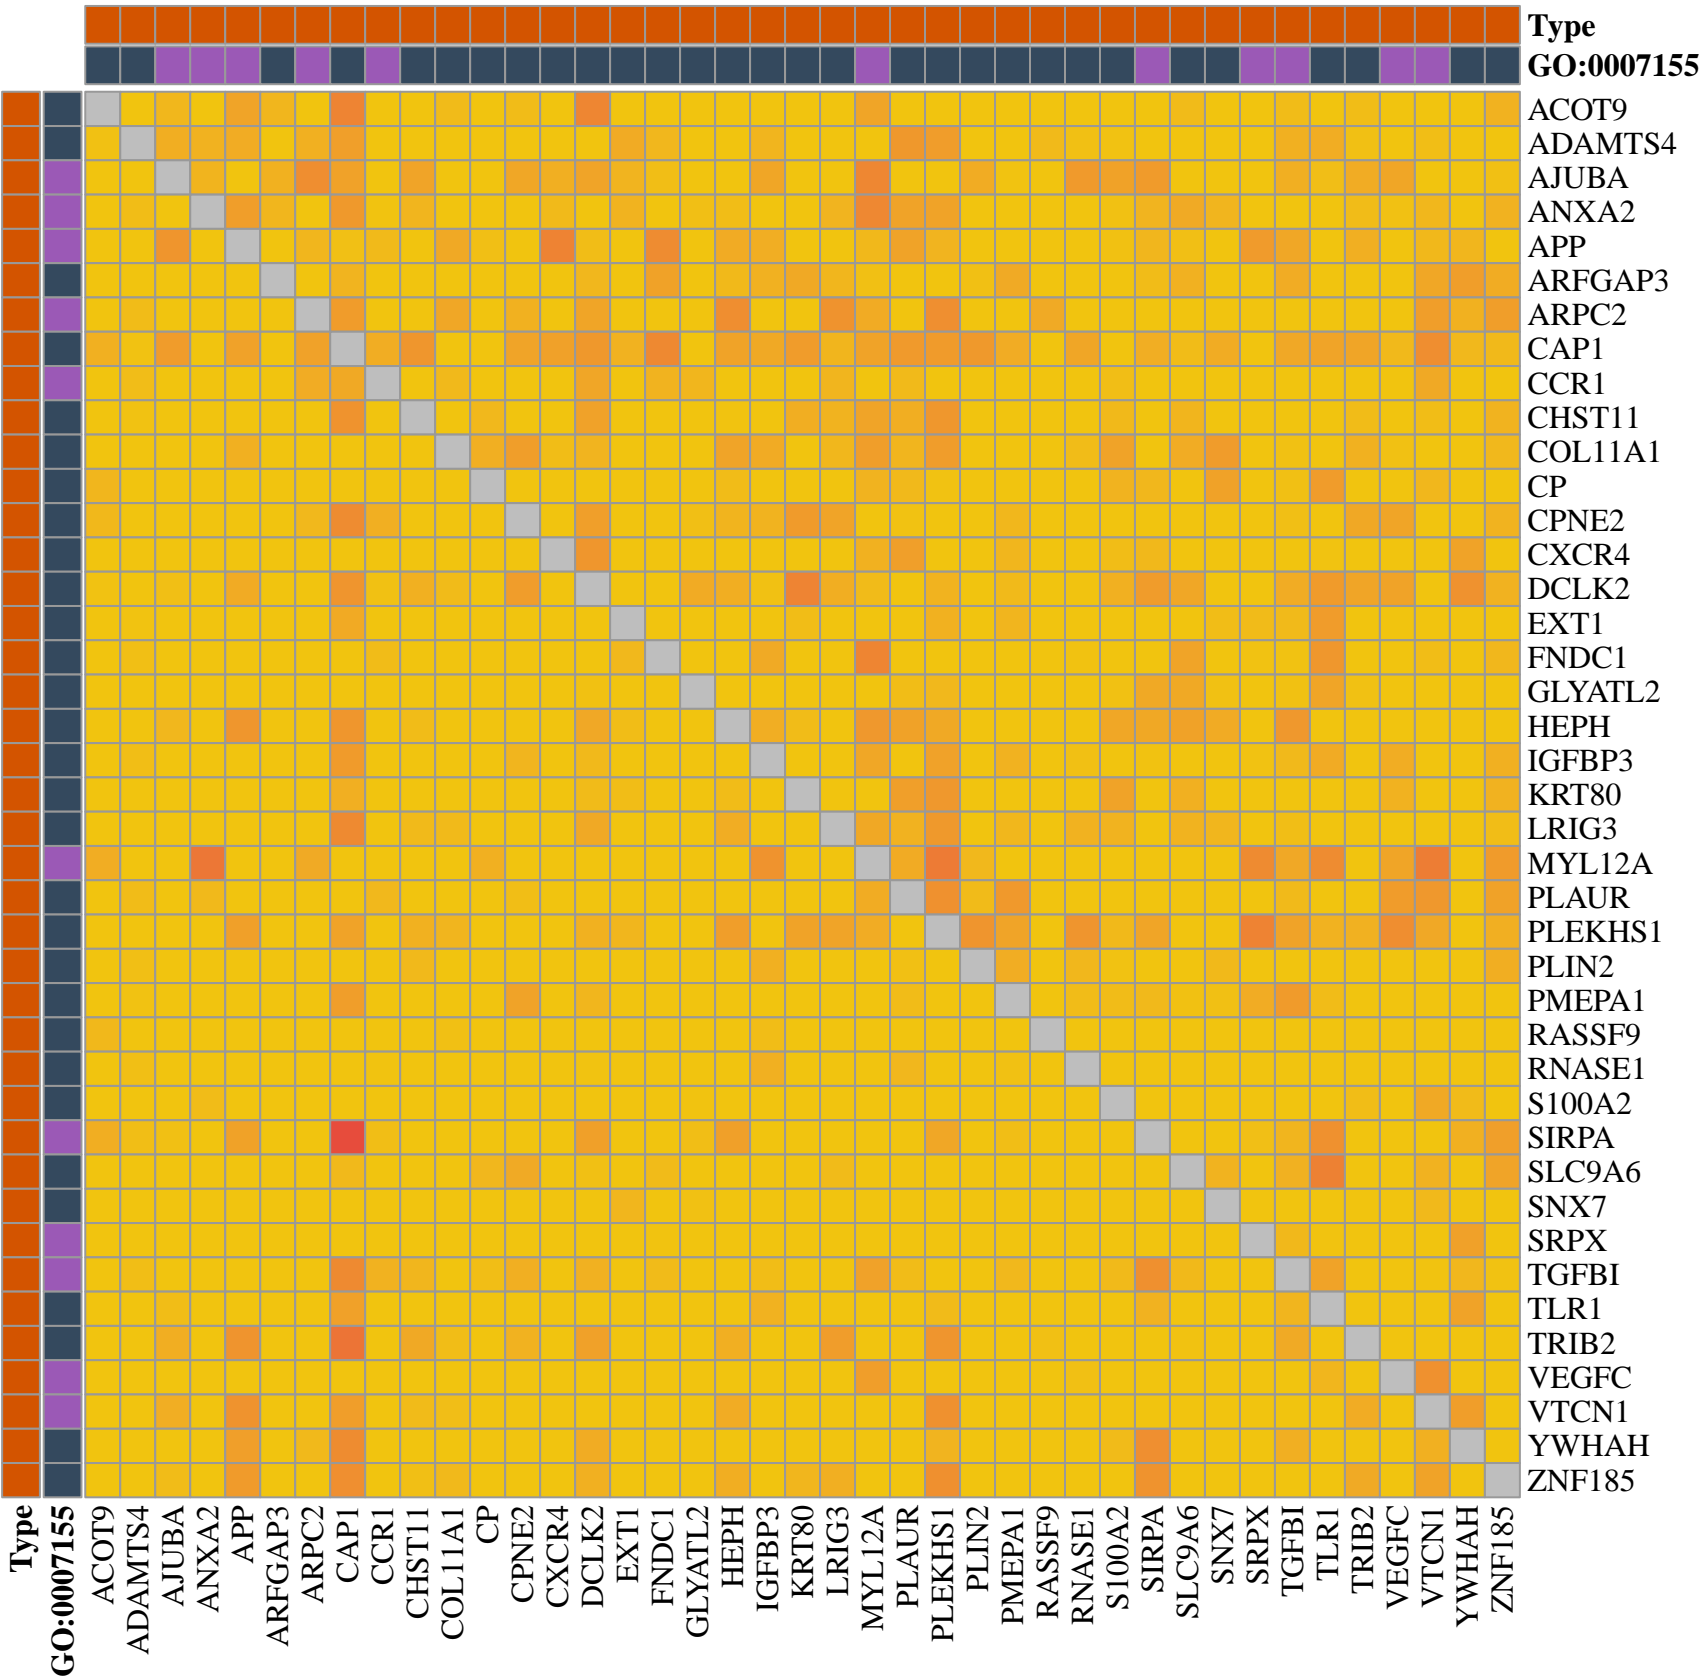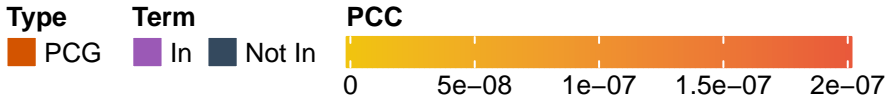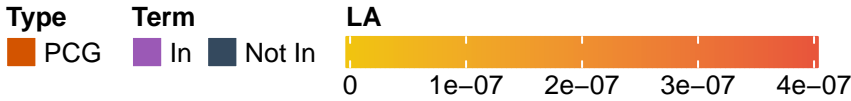

Module110

PCC

LA

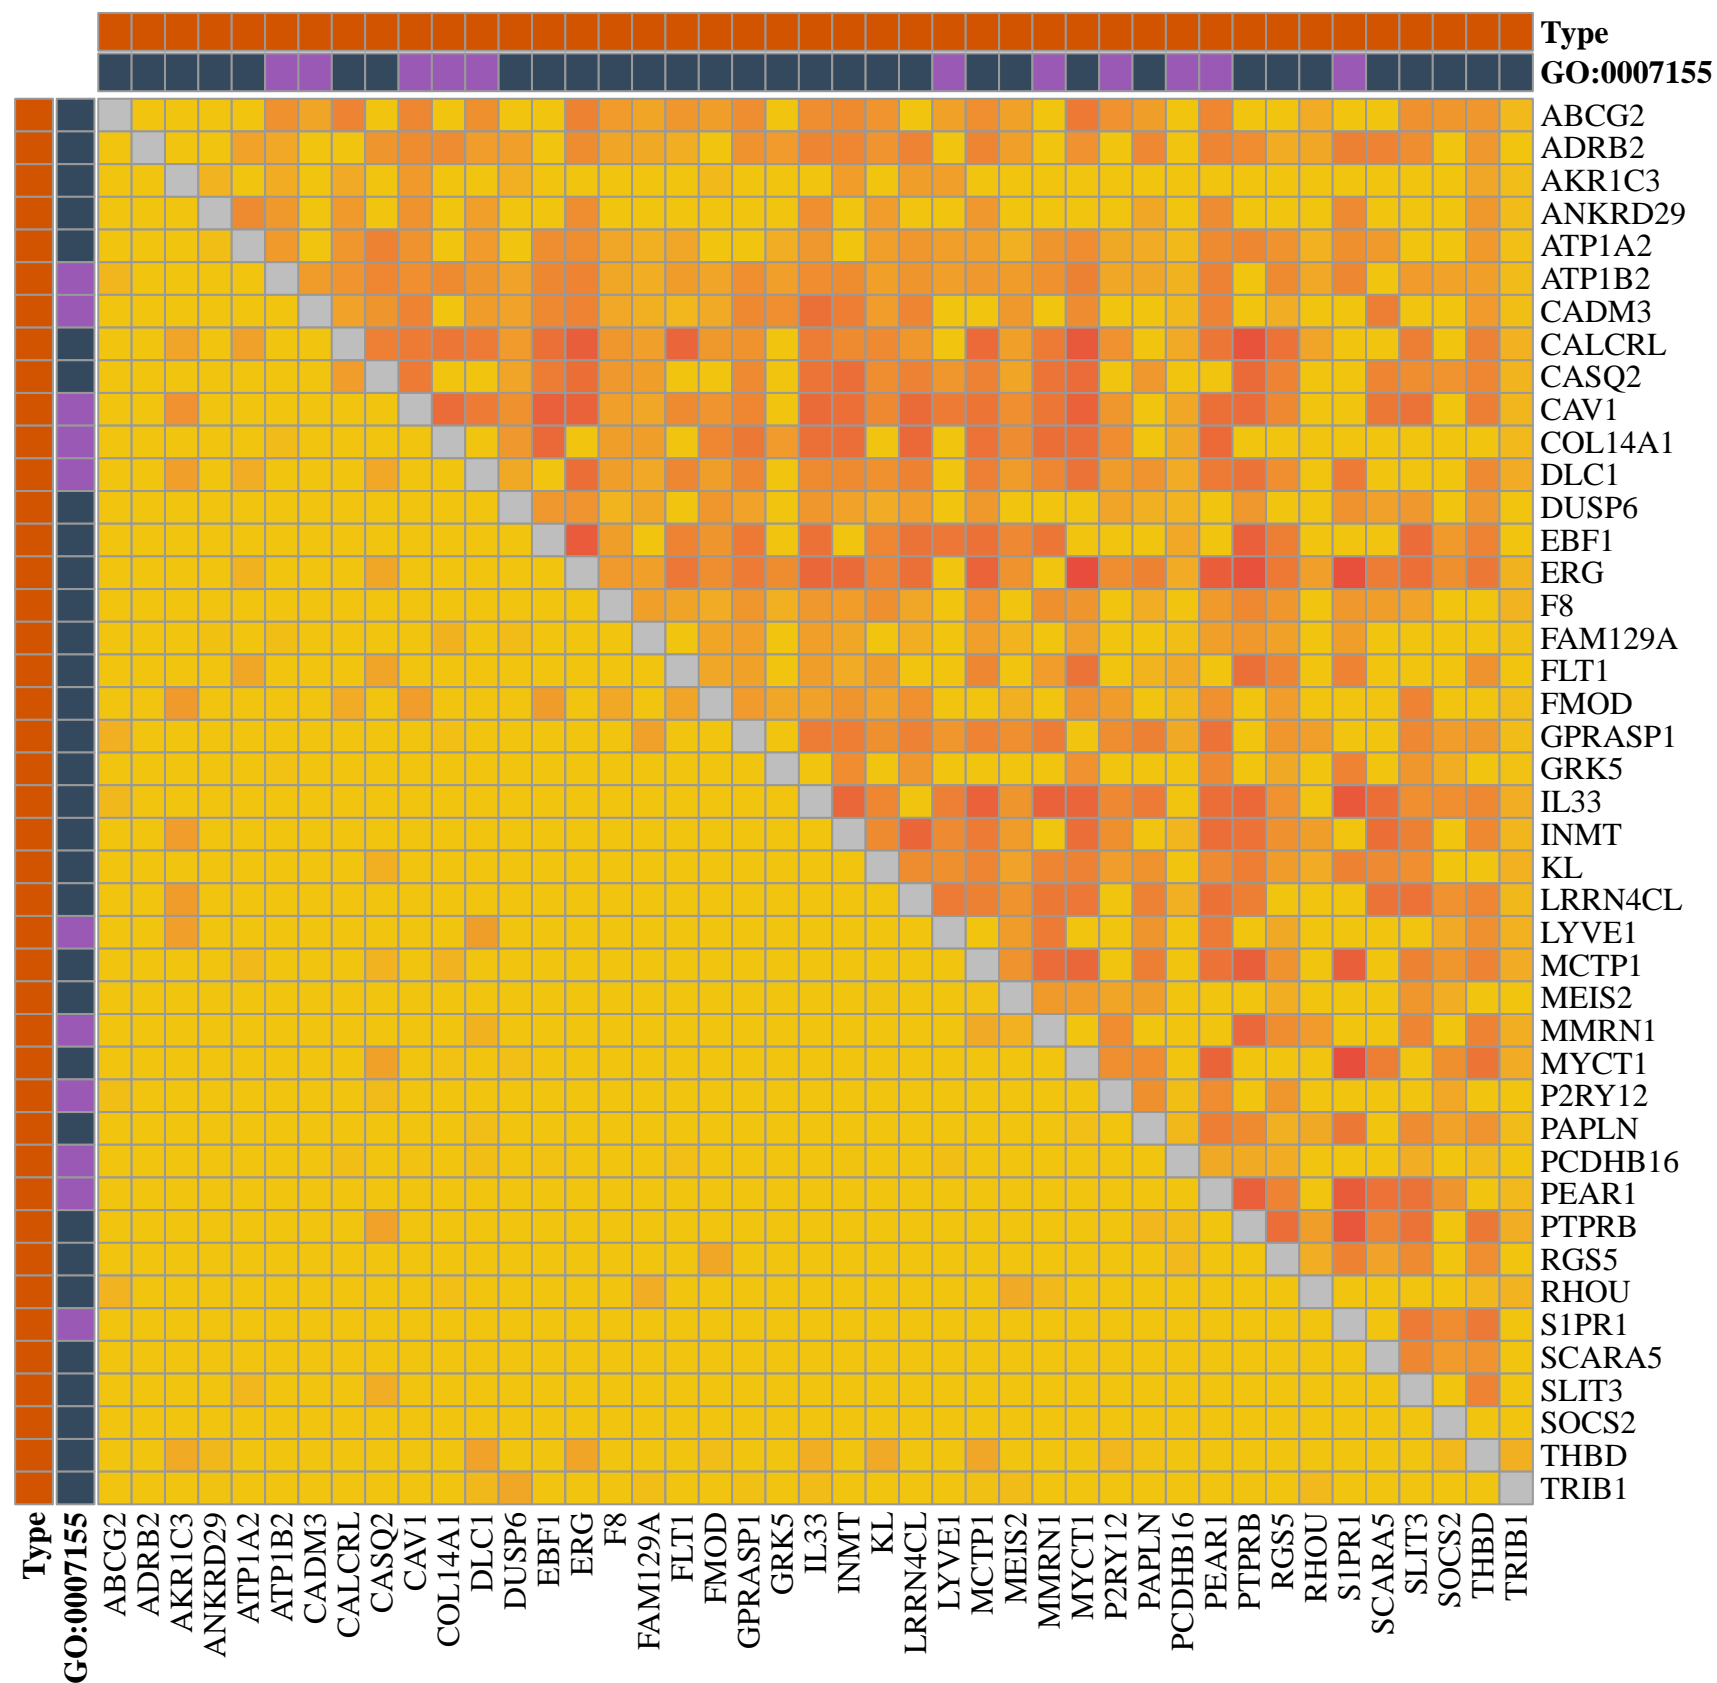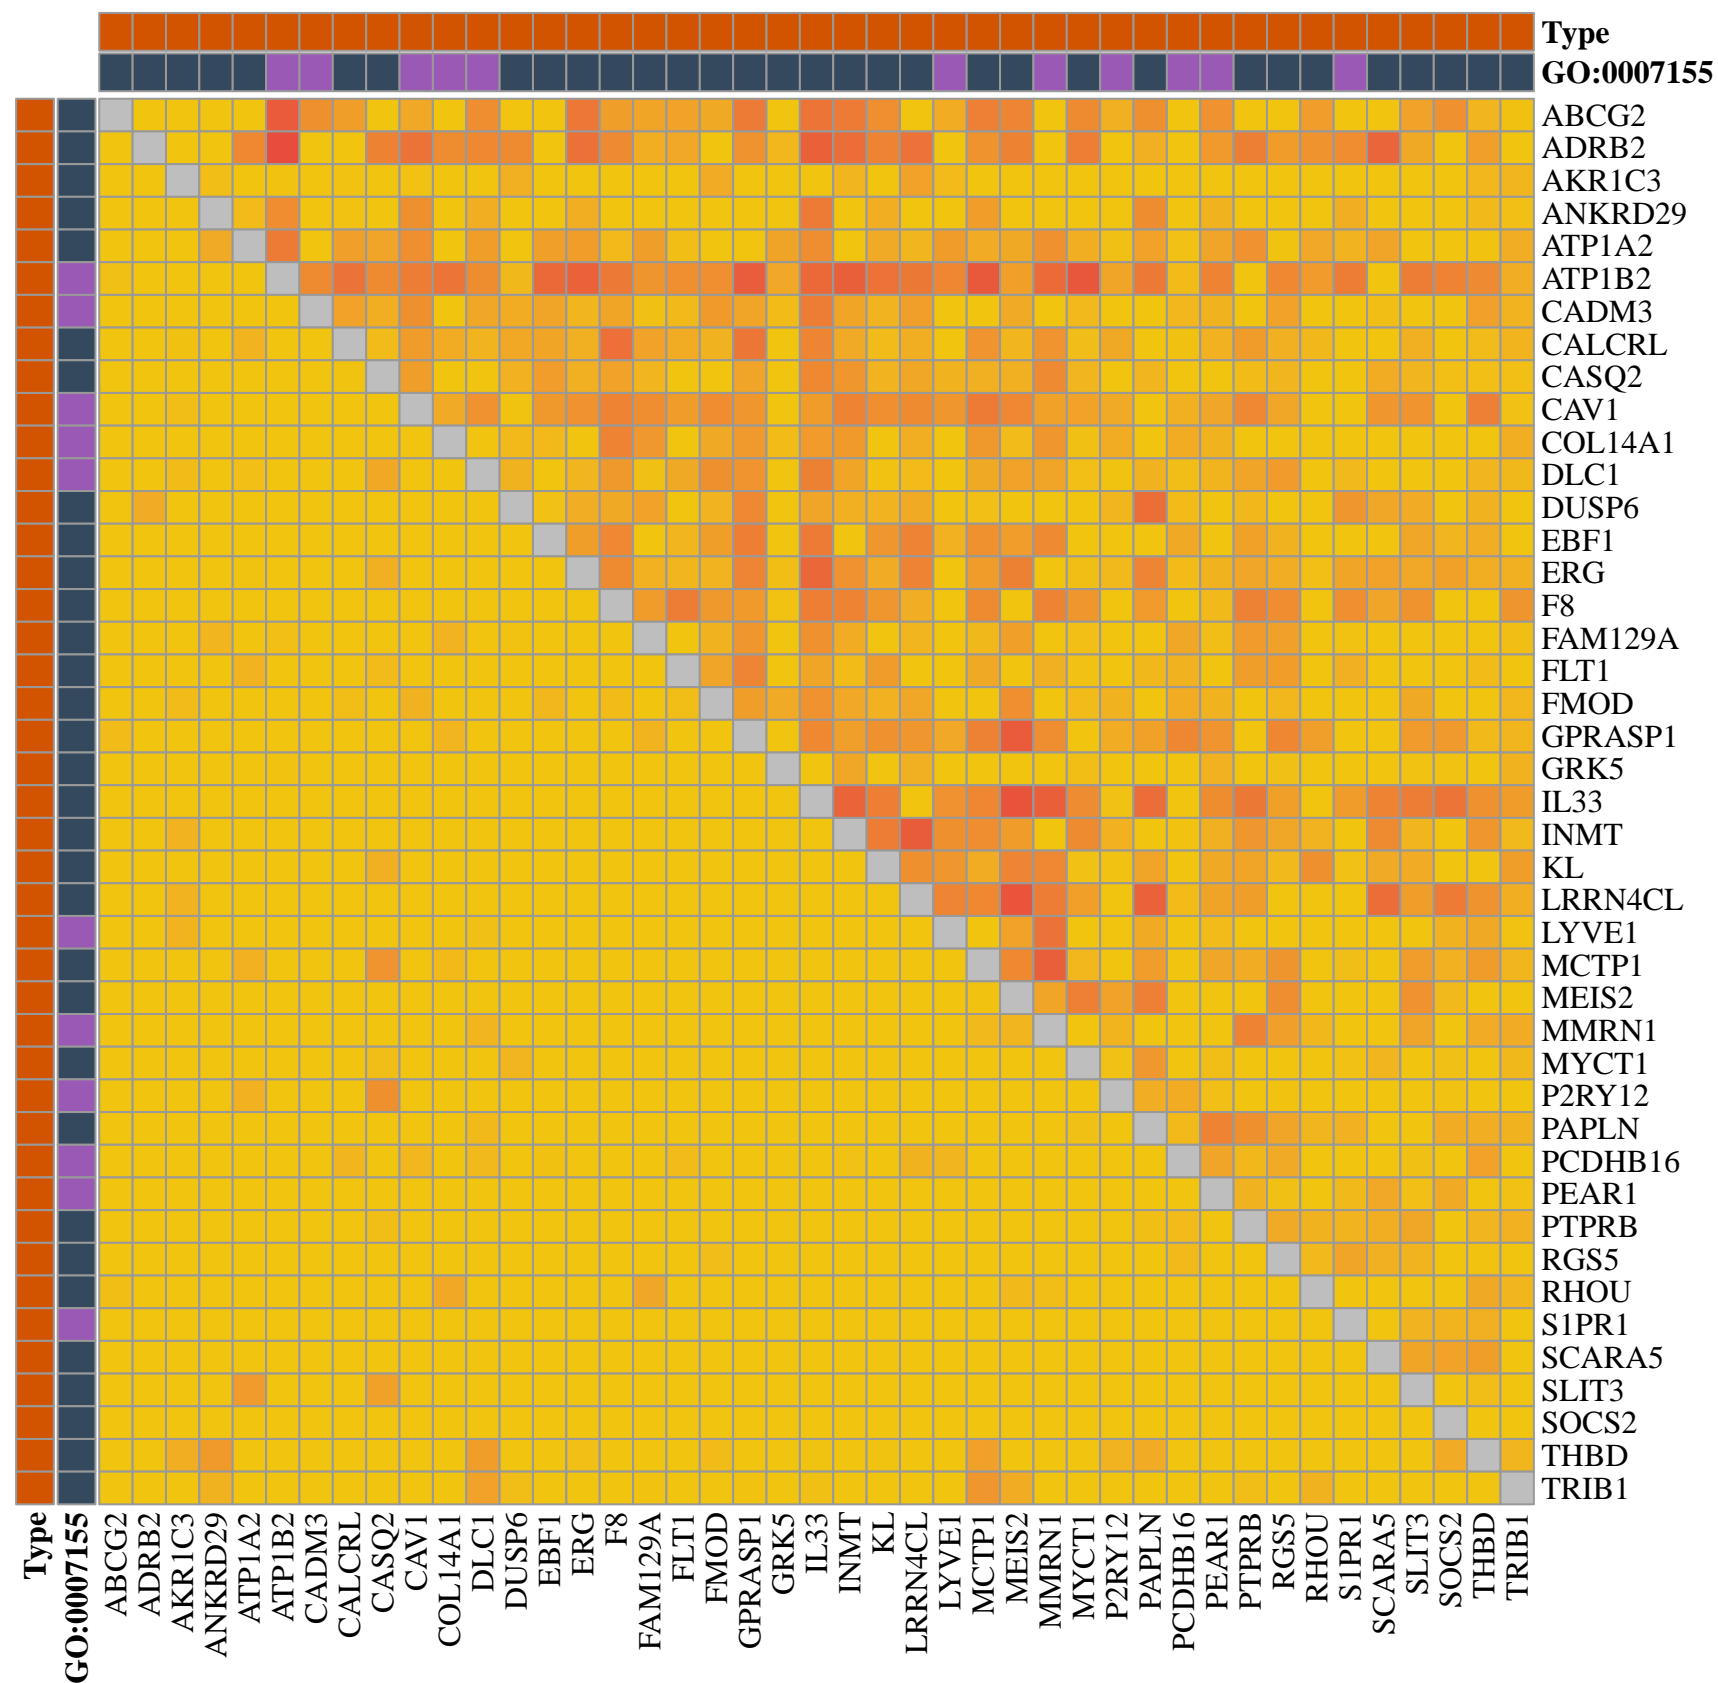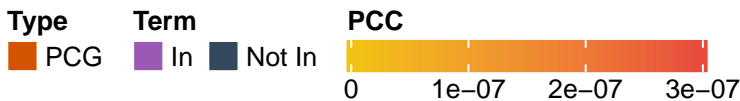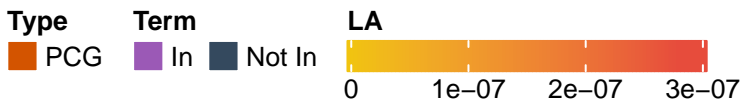

Module84

PCC

LA

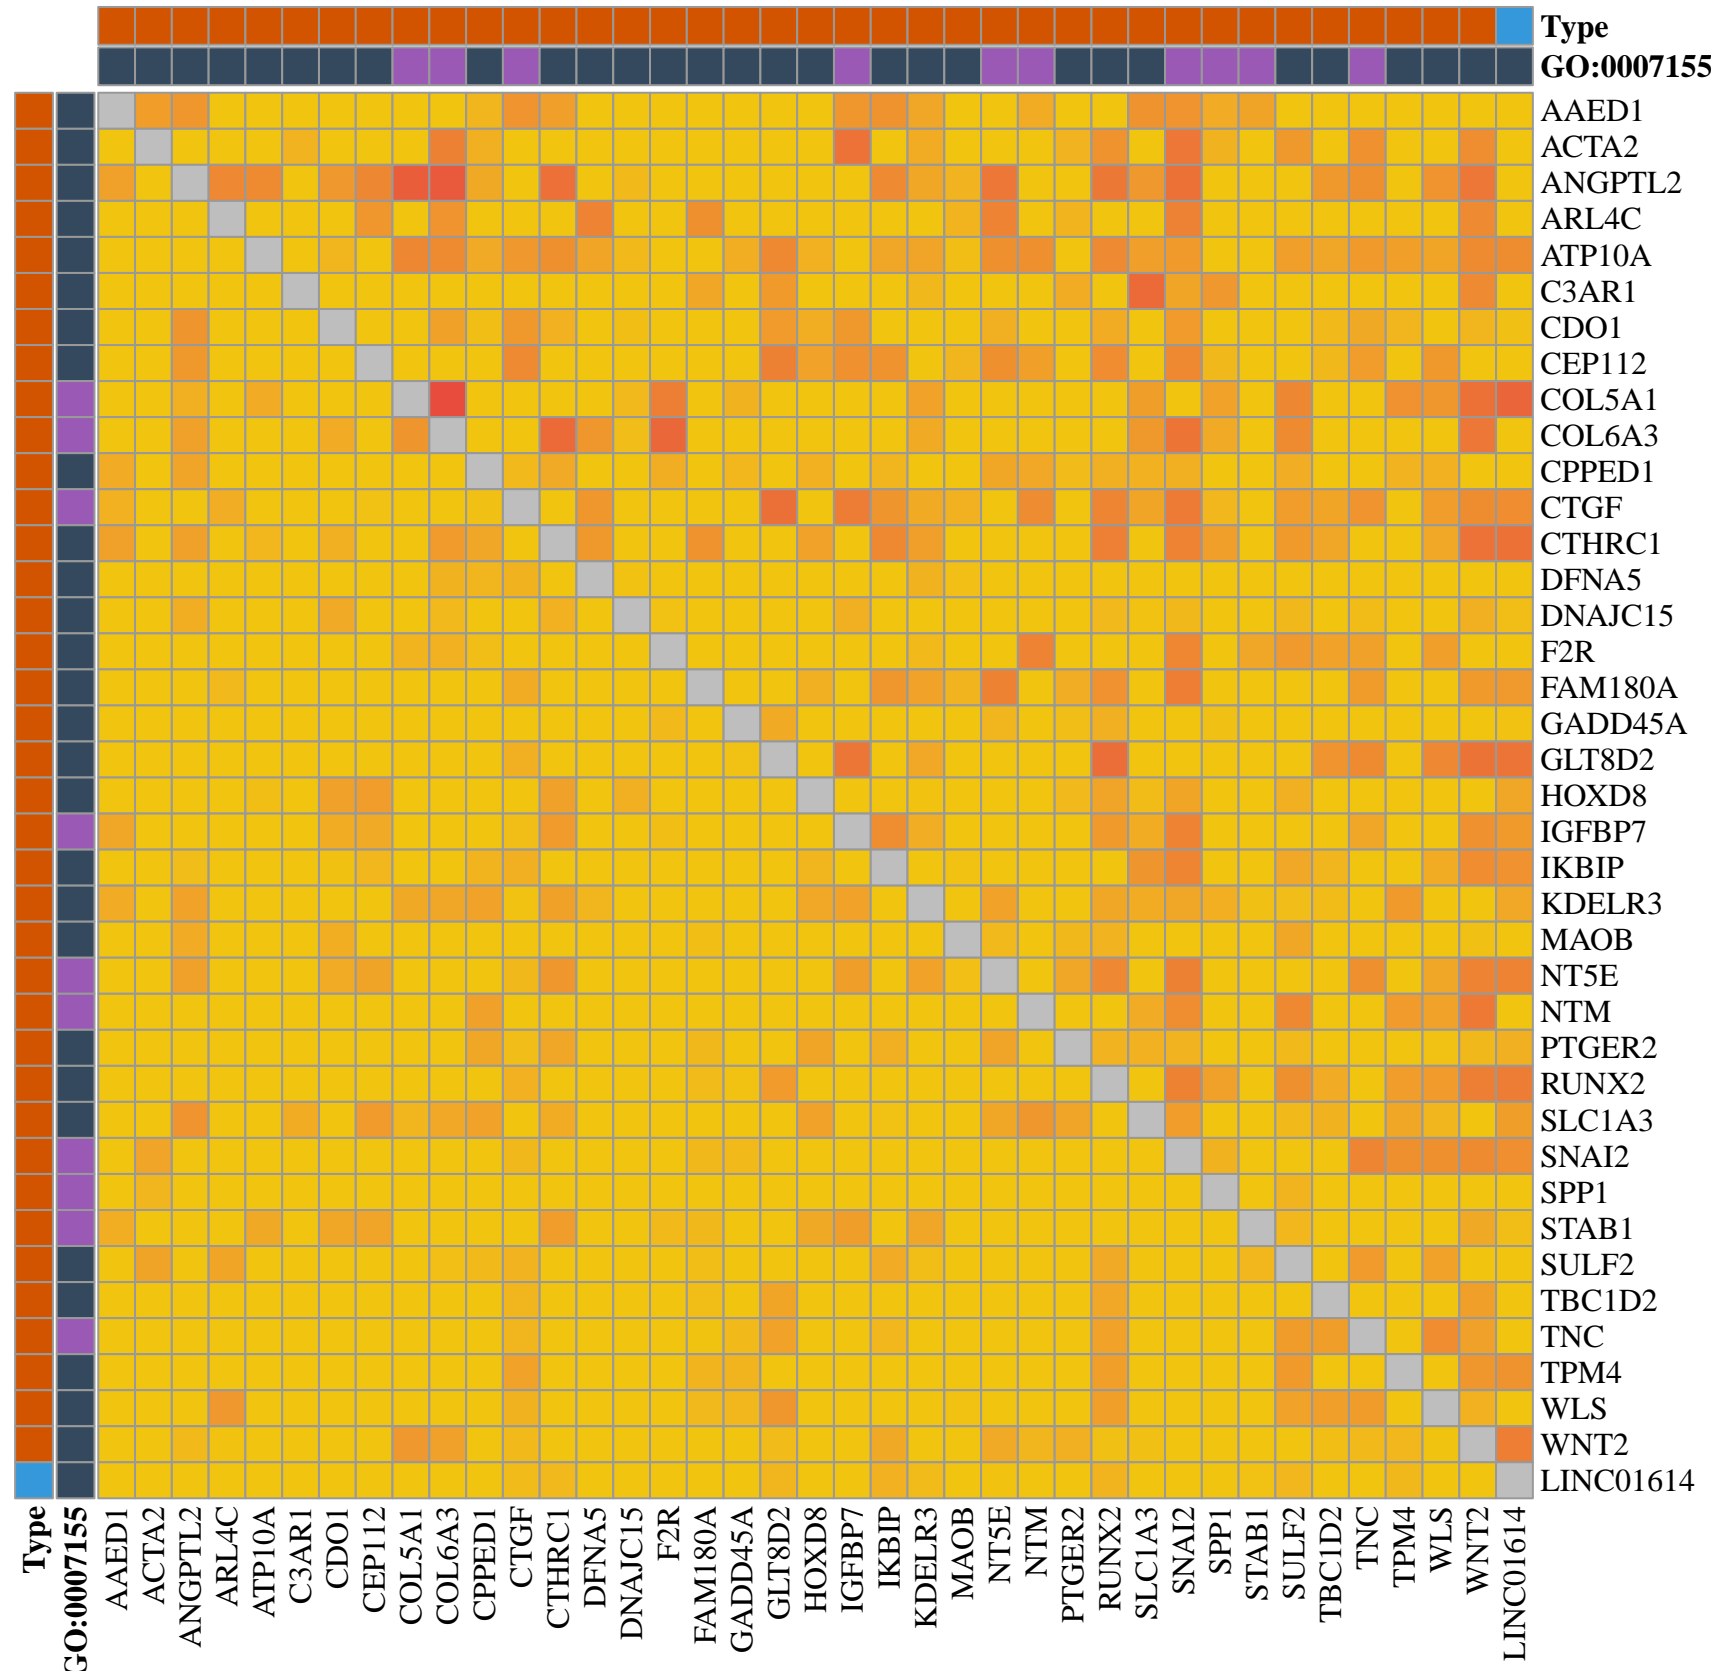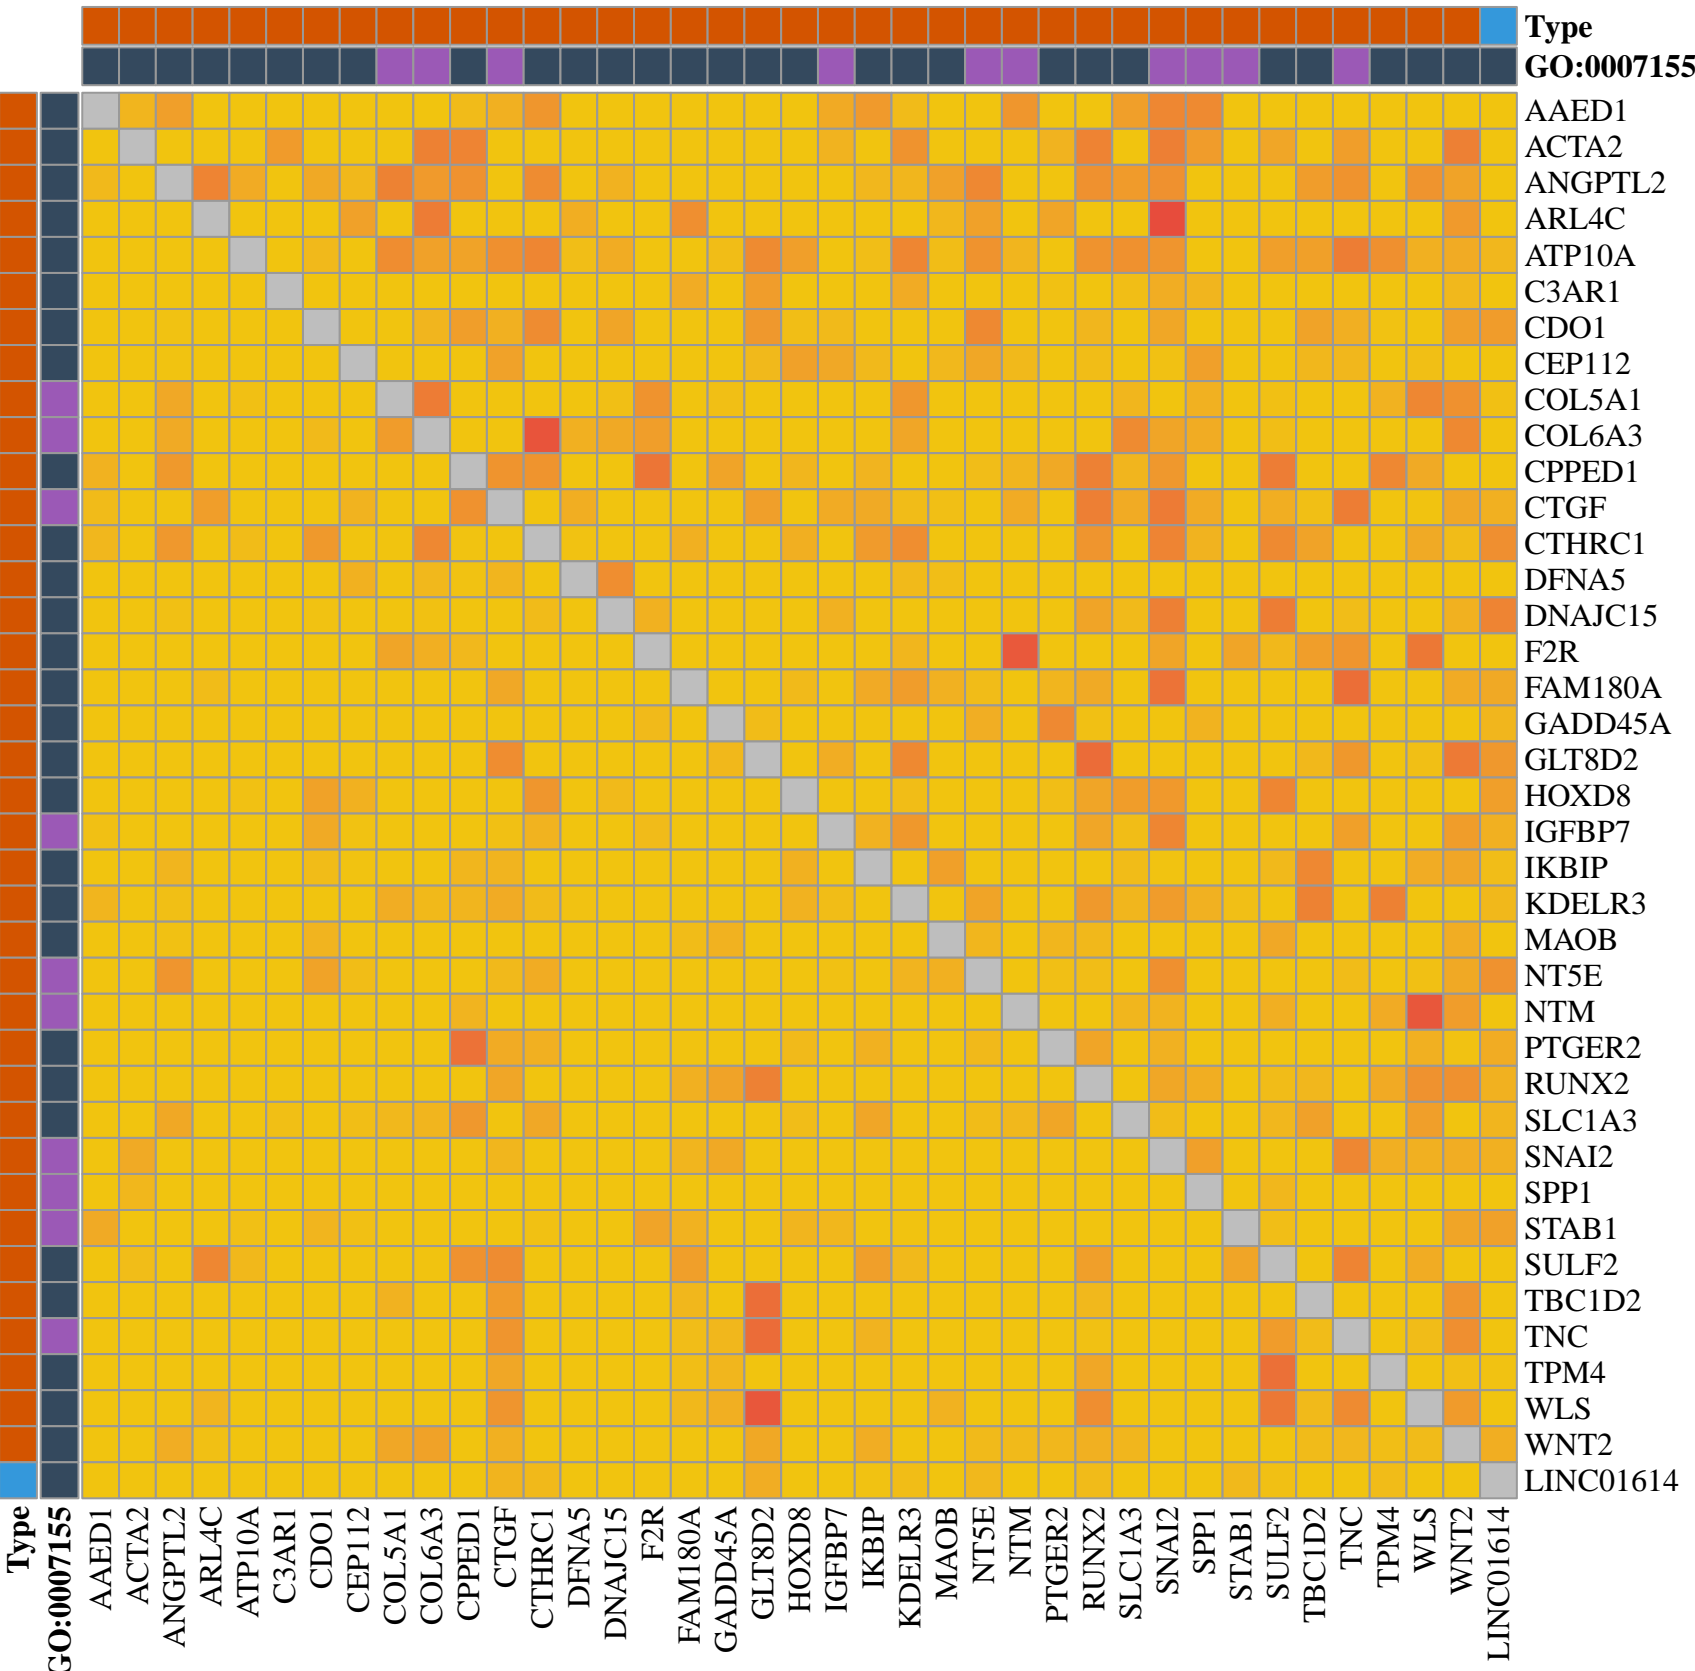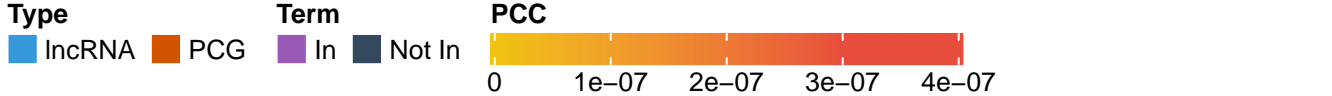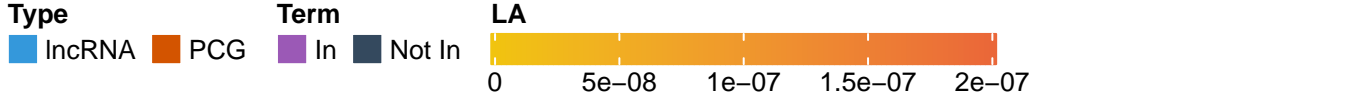





Module57

PCC

LA

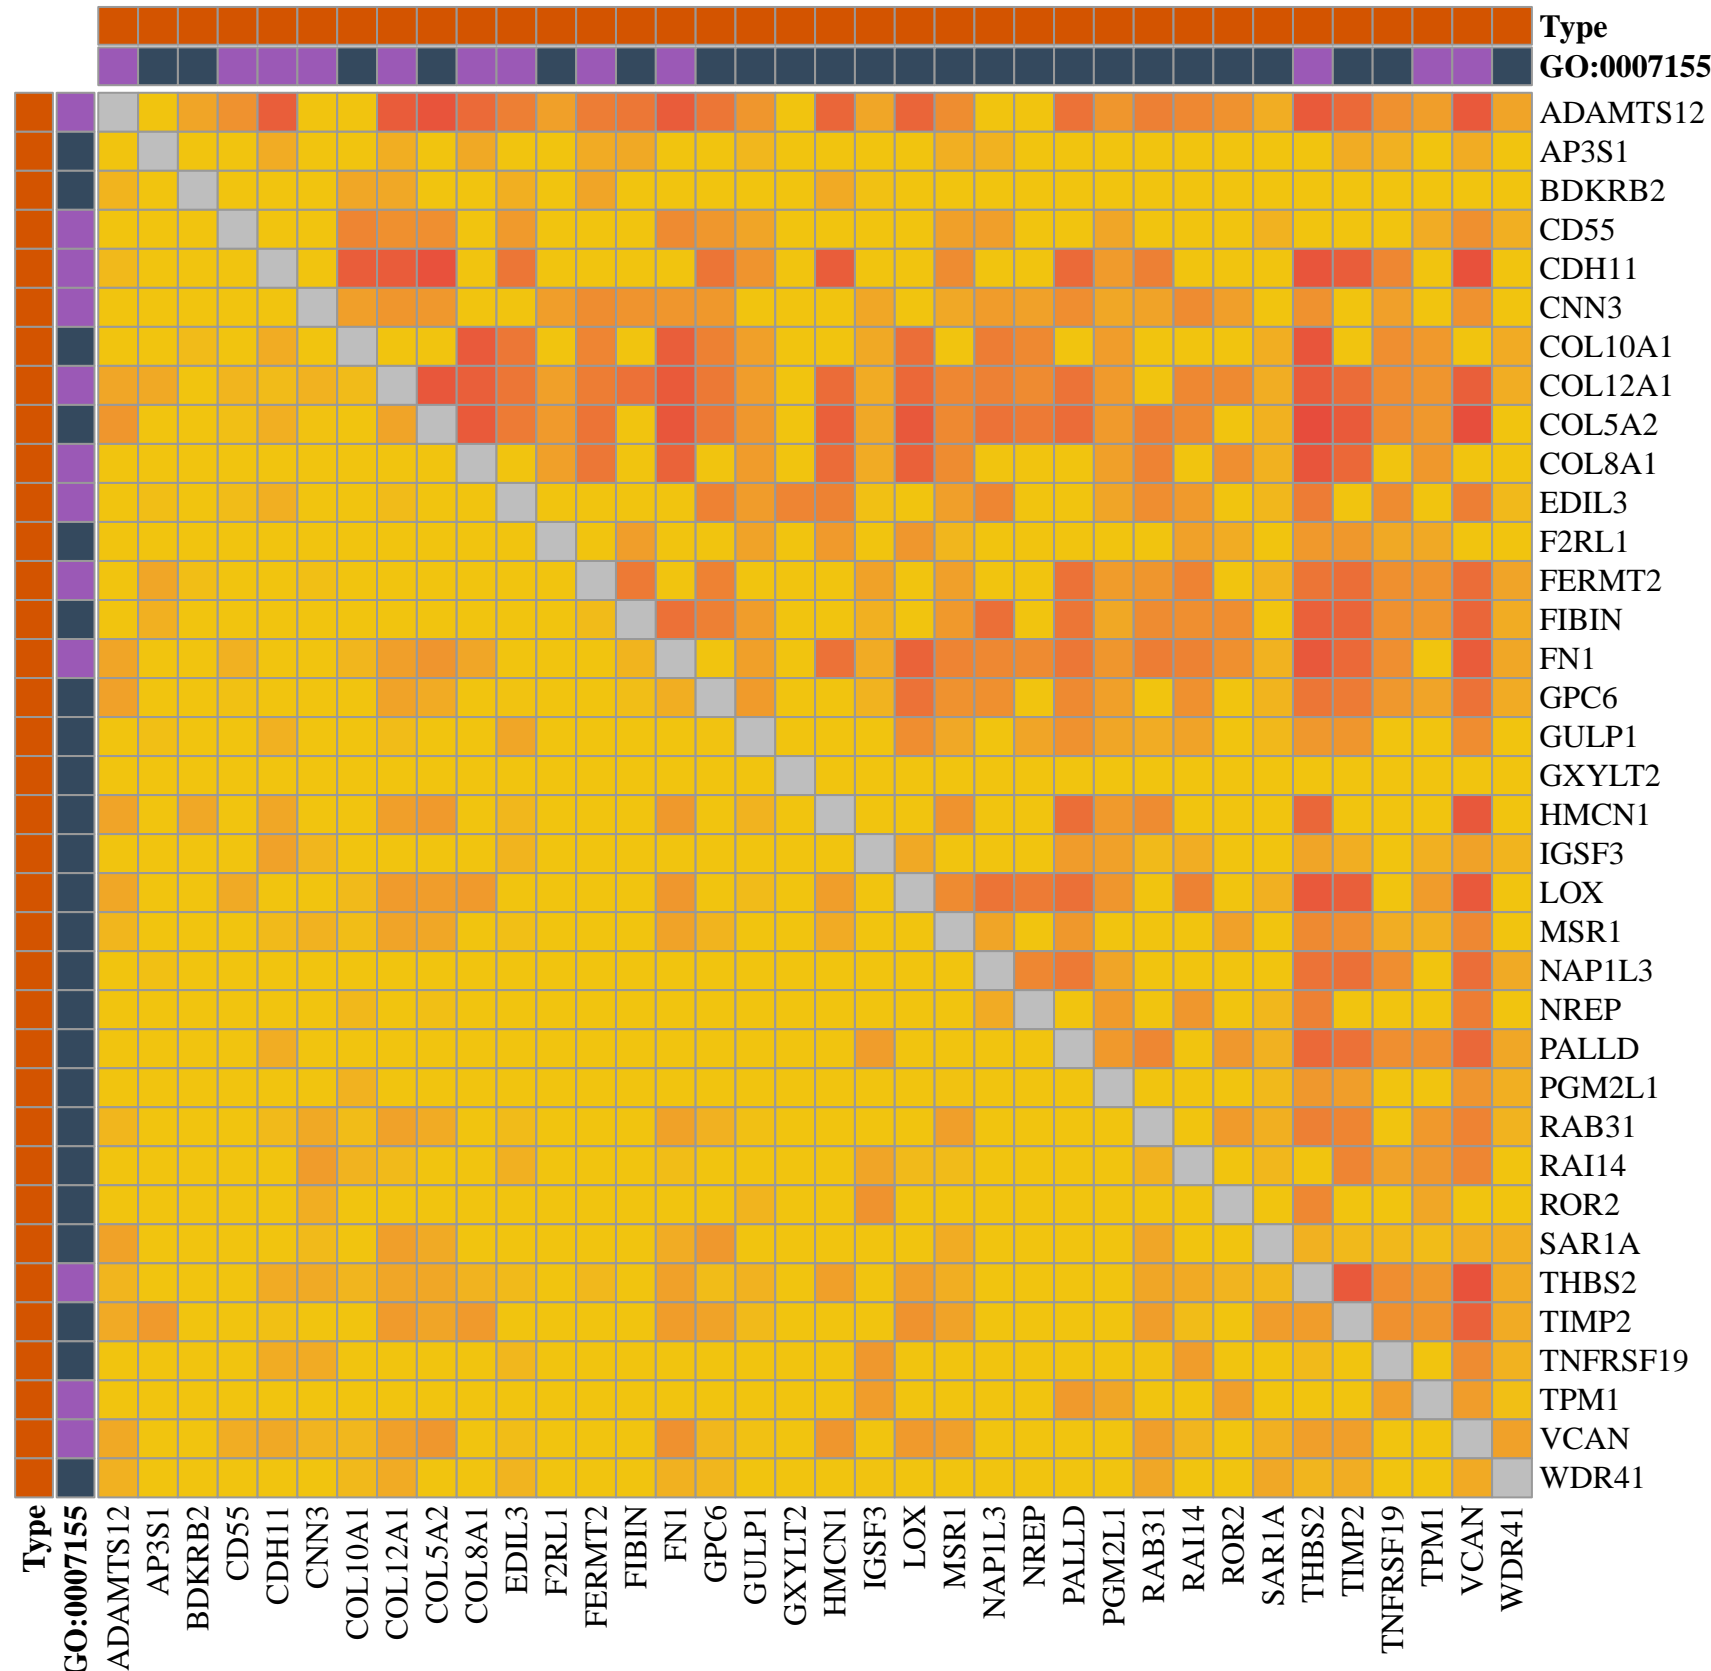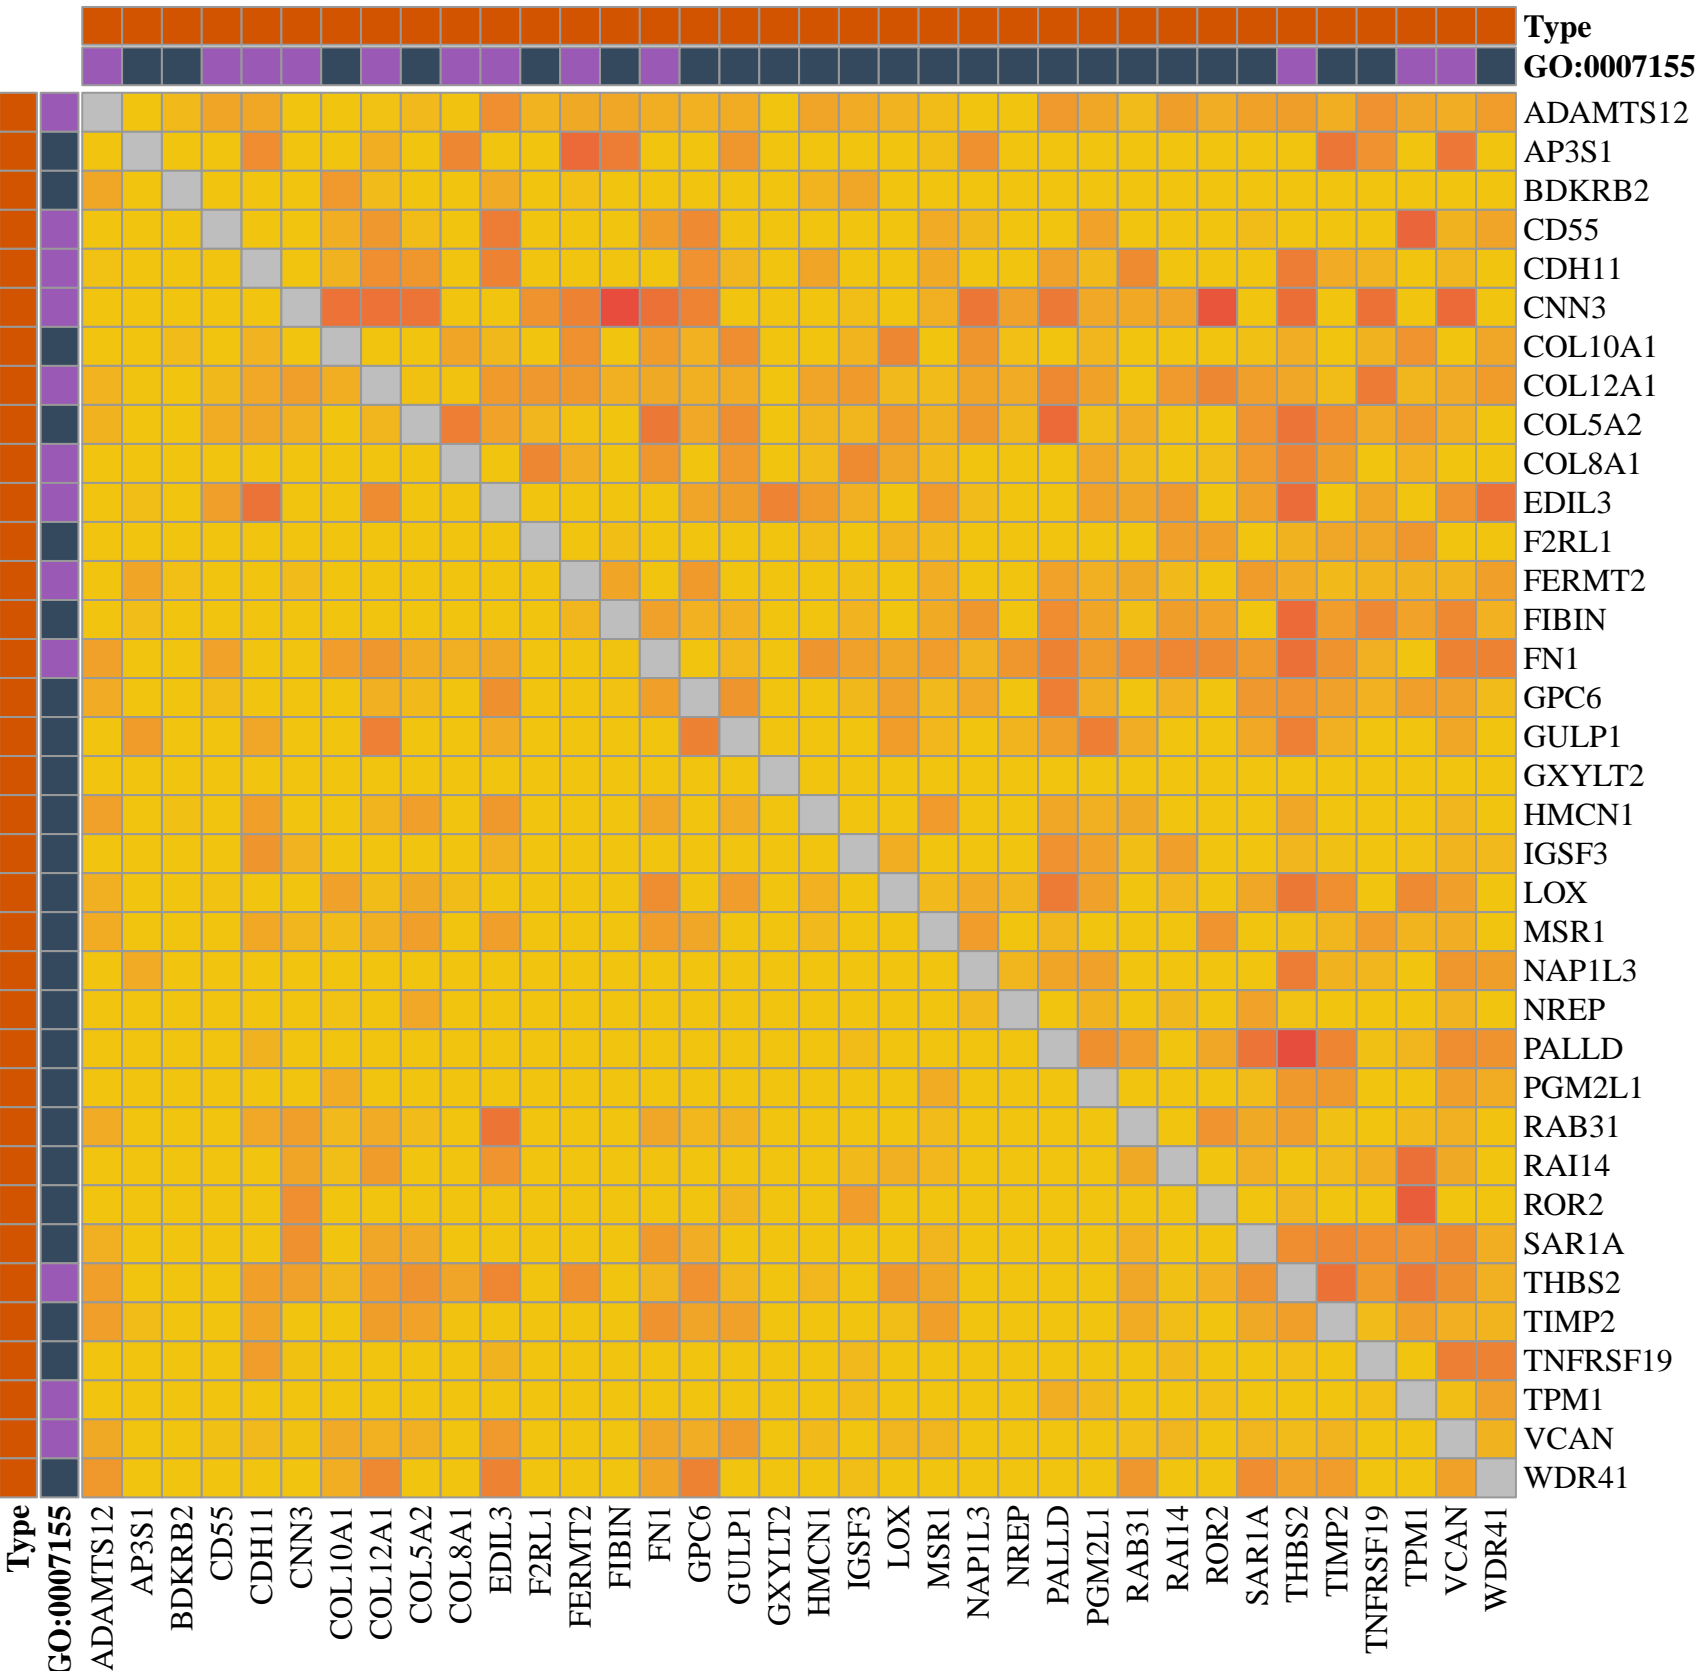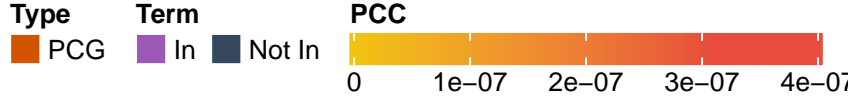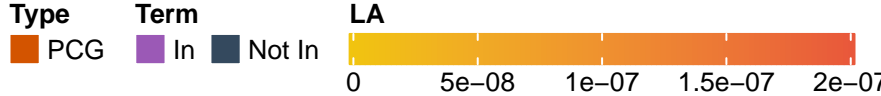

Module238

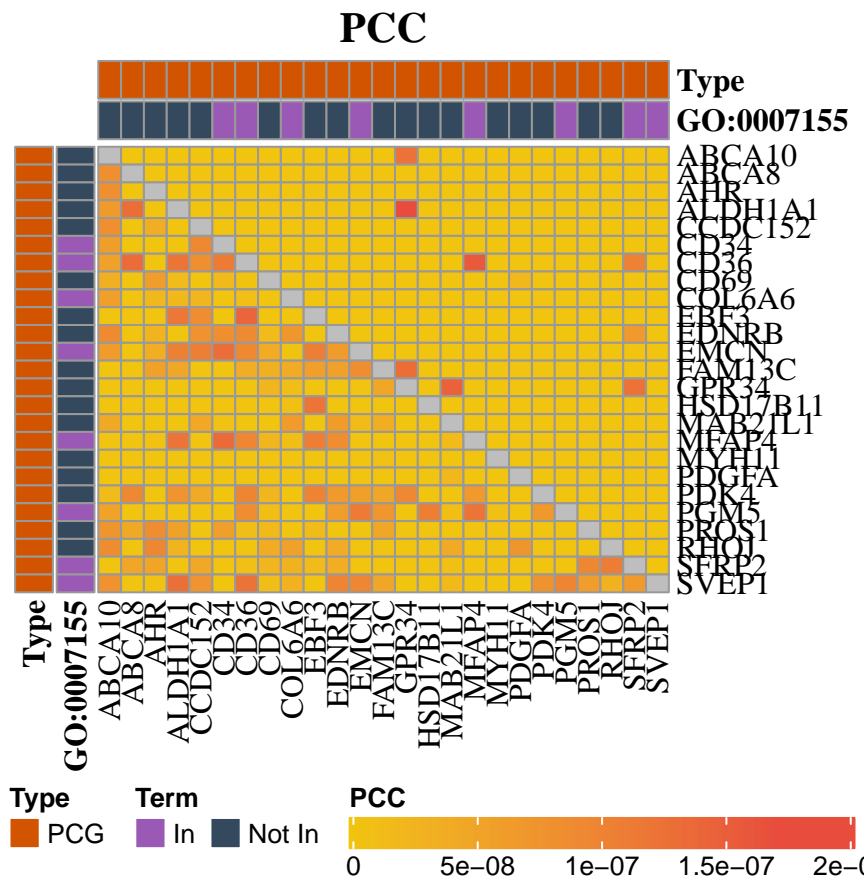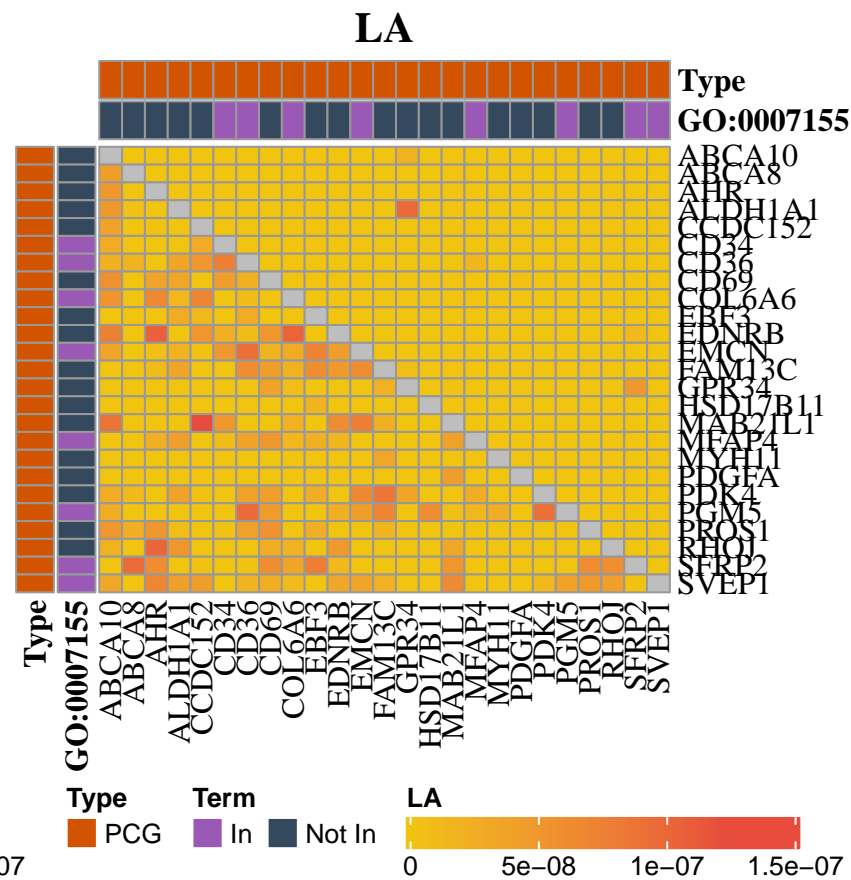

Module349

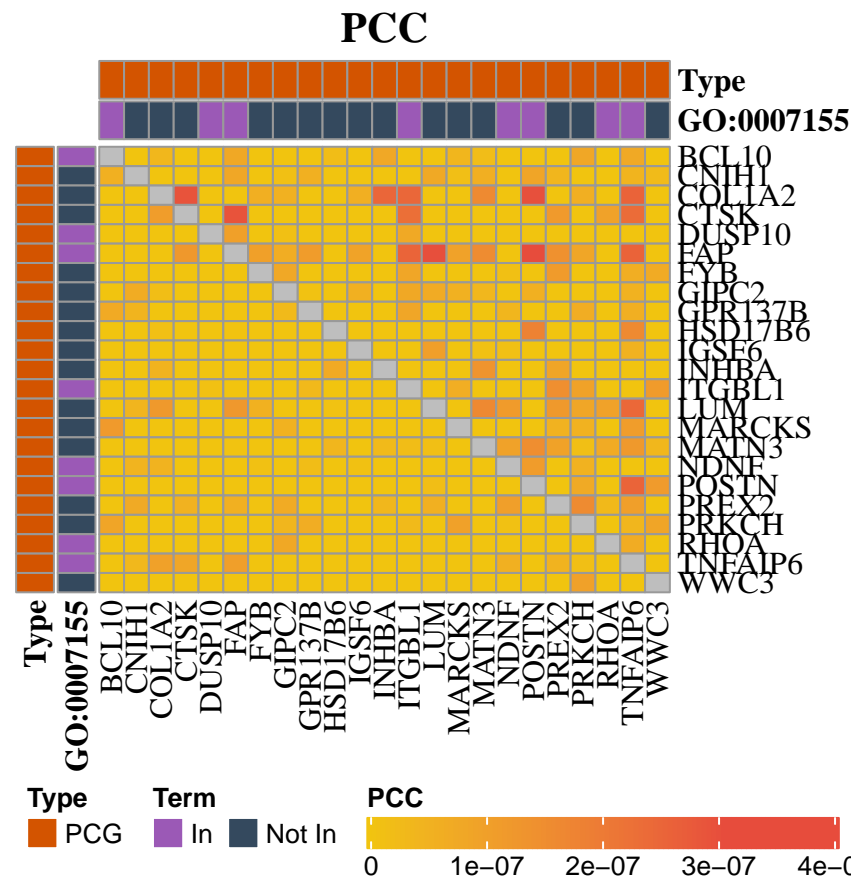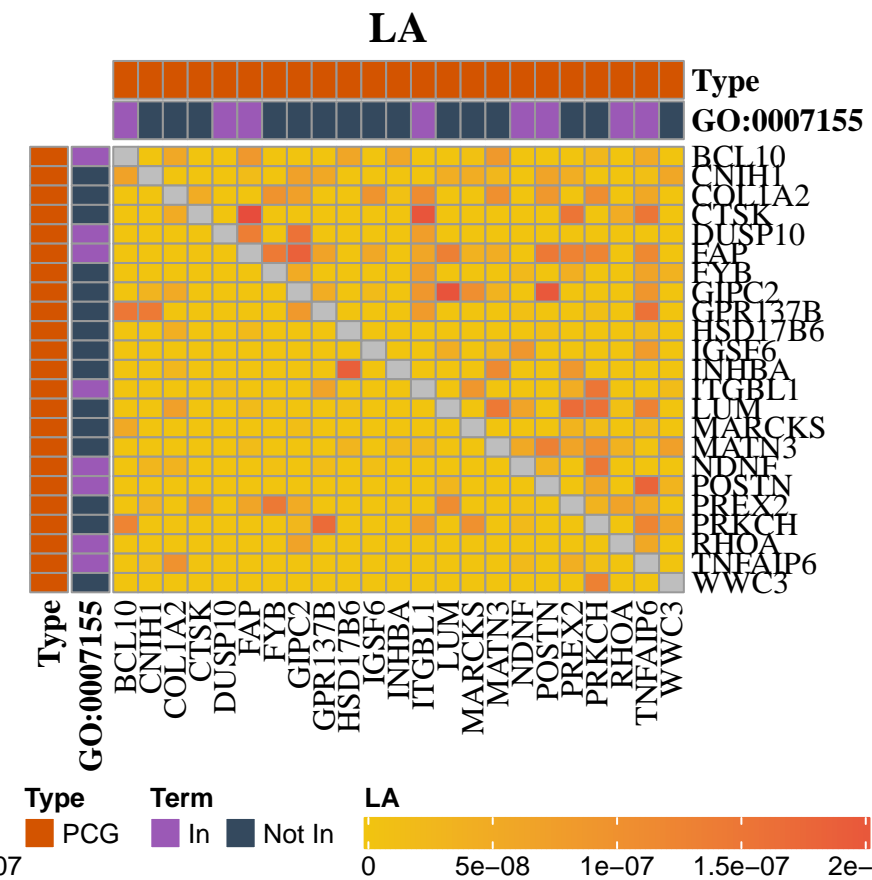

Module178

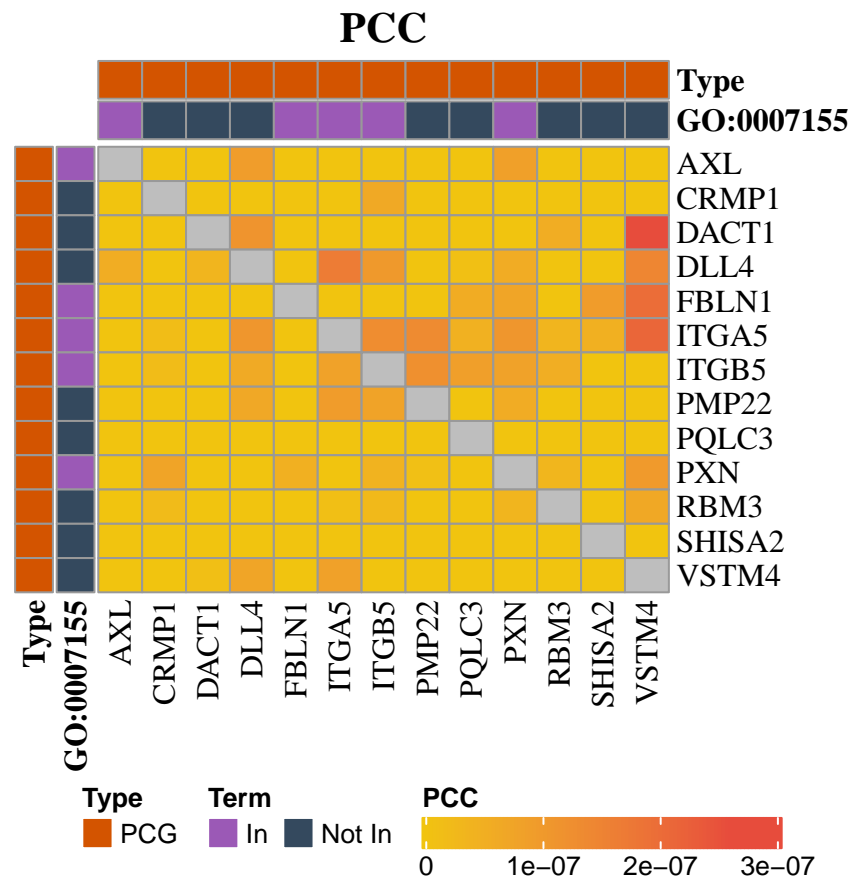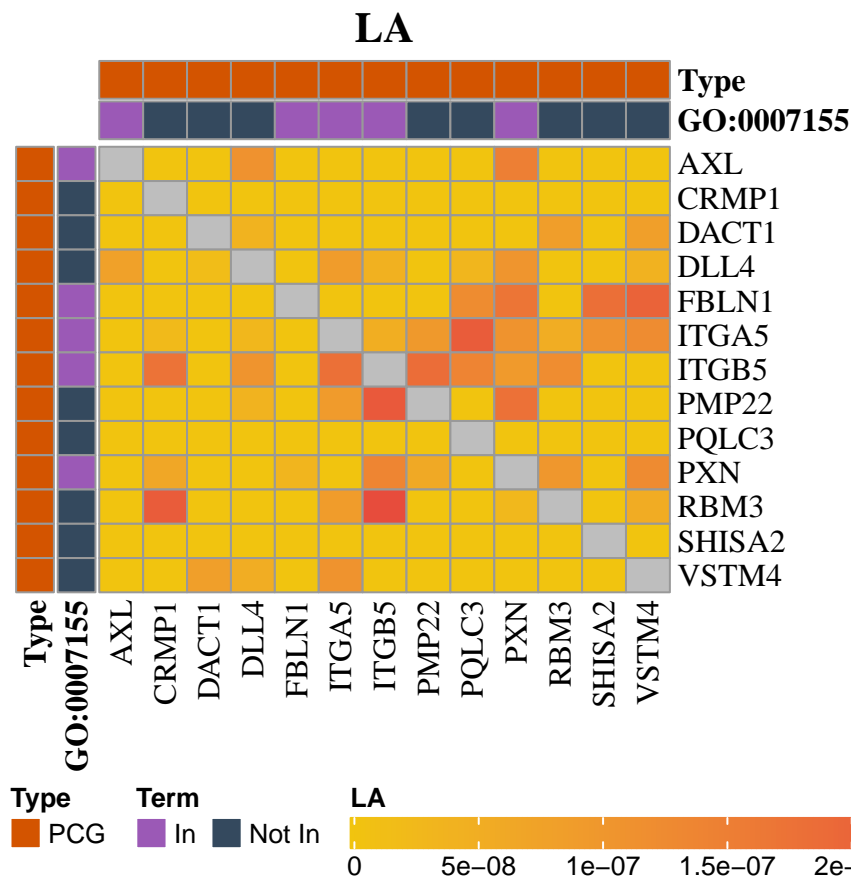

Module151

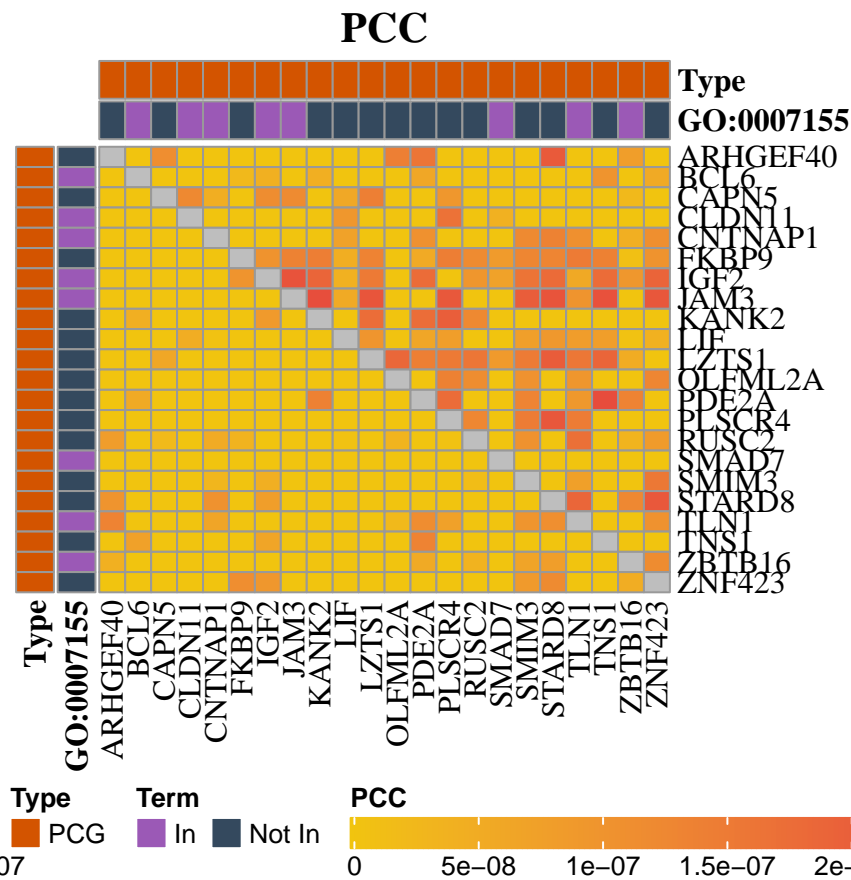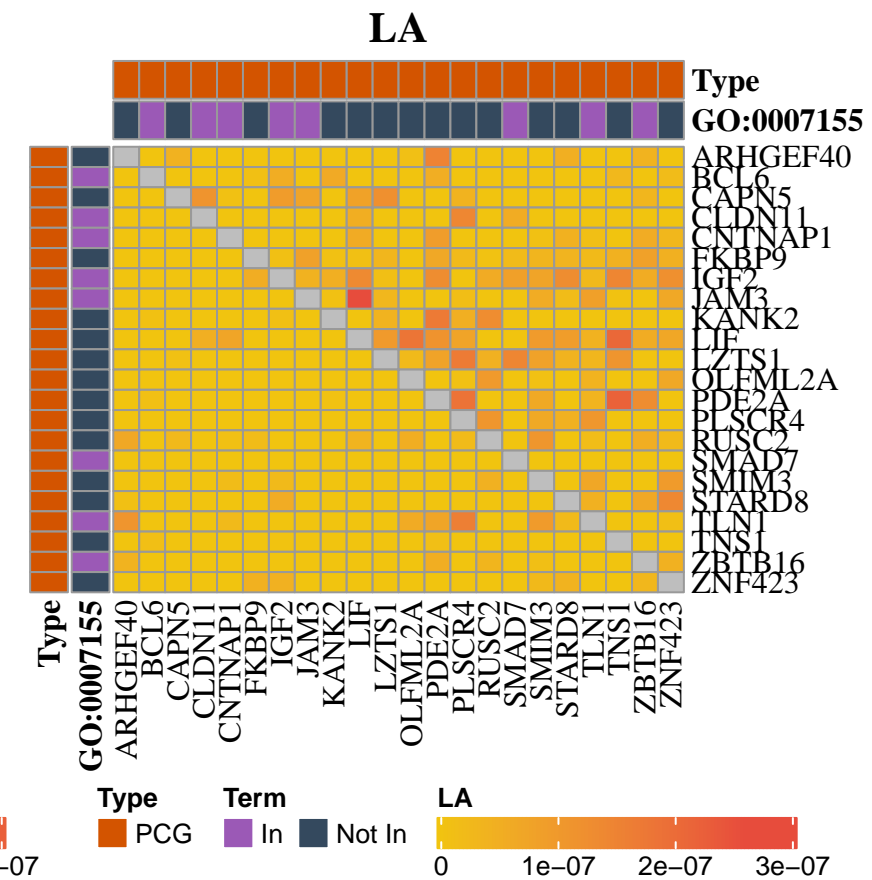

Supplement: Supplementary file [file 22043418]
